# Supplementary material for: A facile and chemoselective synthesis of 1,4-benzodiazepin-2-ones and dienyl thiazolidin-4-ones
Source: Royal Society of Chemistry journal article supplement (doi:10.1039/c6ra10021j), 2016-01-01
Supplement: c6ra10021j1.pdf [file c6ra10021j1.pdf]

## Supporting Information

### A Facile and Chemoselective Synthesis of 1,4-Benzodiazepin-2-ones and Dienyl Thiazolidin-4-ones

Bilash Kuila<sup>a</sup>, Yogesh Kumar<sup>a</sup>, Dinesh Mahajan<sup>b</sup>, Kapil Kumar<sup>c</sup>, Prabhpreet Singh<sup>c</sup>, Gaurav Bhargava<sup>a\*</sup>

<sup>a</sup>Department of Applied Sciences, I. K. Gujral Punjab Technical University, Kapurthala 144603, Punjab, India

<sup>b</sup>SphaeraPharma Pvt. Ltd, Plot 32, Sec-5, IMT Manesar, Gurgaon, Haryana, India

<sup>c</sup>Department of Chemistry, Guru Nanak Dev University, Amritsar 143005, Punjab, India

#### General information:

#### METHODS AND MATERIALS:

Unless otherwise noted, commercial available materials were used without further purification. Air sensitive reactions were carried out under argon atmosphere. Anhydrous solvents were obtained from Sigma Aldrich, Merck. Thin layer chromatography (tlc) was carried out using 0.2 mm Kieselgel F254 (Merck) silica plates and compounds viewed under an ultraviolet lamp. NMR spectra were recorded on a Bruker 300 MHz spectrometer operating at 300 MHz for <sup>1</sup>H and 75 MHz for <sup>13</sup>C. Chemical shifts ( $\delta$ ) are quoted in parts per million (ppm) relative to internal solvent reference (CDCl<sub>3</sub>  $\delta$  = 7.26 for <sup>1</sup>H NMR and  $\delta$  = 77.0 for <sup>13</sup>C NMR and DMSO-d<sub>6</sub>  $\delta$  = 2.50 for <sup>1</sup>H NMR and  $\delta$  = 39.9 for <sup>13</sup>C NMR). Coupling constants are given in Hz. Data is reported as followed: chemical shift, multiplicity (s = singlet, bs = broad singlet, d = doublet, t = triplet, dd = double doublet, dt = double triplet, m = multiplet), coupling constants (Hz), and integration. High resolution mass spectra were recorded on a Bruker-micrOTOF-Q II mass spectrometer.

#### EXPERIMENTAL PROCEDURES:

**General procedure for the preparation of 2-(aryl)-3-(2-oxo-4-styryl-1-arylazetid-3-yl)thiazolidin-4-one 4a-i and 6a-g:** To a solution of compound **1** (0.5 g, 1 equiv.) in toluene (10 mL) was added successively aldehyde (1.2 equiv.) and MgSO<sub>4</sub> (10 equiv.). The reaction mixture was heated at 80 °C for 4 hrs. Thioglycolic acid (1.3 eq.) was added in the reaction mixture and reaction mixture was heated at 80 °C for additional 12 hrs. The progress of the reaction was monitored by *tlc* considering 3-amino-2-azetidinone as the limiting reactant. After completion of

reaction, excess of solvent was evaporated under reduced pressure. The crude product was purified *via* column chromatography using 20-35% mixture of ethyl acetate in hexane as eluent to get **4** and **6** as pure compounds.

*2-(4-methoxyphenyl)-3-(2-oxo-4-styryl-1-p-tolylazetididin-3-yl)thiazolidin-4-one (4a)*: White solid; yield 90%; mp: 125-129 °C; <sup>1</sup>H NMR (300 MHz, CDCl<sub>3</sub>): δ 2.26 (s, 3H), 3.74 (d, *J* = 1.8 Hz, 1H), 3.76 (d, *J* = 1.2 Hz, 1H), 3.83 (s, 3H), 4.44 (t, *J* = 6 Hz, 1H), 4.51 (d, *J* = 5.4 Hz, 1H), 5.68 (s, 1H), 6.44 (d, *J* = 7.2 Hz, 2H), 6.82 (d, *J* = 8.4 Hz, 2H), 7.04 (d, *J* = 8.4 Hz, 2H), 7.27-7.37 (m, 9H); <sup>13</sup>C NMR (CDCl<sub>3</sub>): δ 20.9, 32.7, 55.4, 61.6, 63.9, 65.3, 114.0, 117.0, 124.1, 126.8, 128.5, 128.8, 129.5, 129.7, 130.0, 133.8, 135.2, 135.7, 137.5, 160.6, 161.6, 171.8; LRMS: 471.2 (M+1), HRMS calcd for C<sub>28</sub>H<sub>27</sub>N<sub>2</sub>O<sub>3</sub>S (MH<sup>+</sup>): 471.1742, found: 471.1739.

*3-(2-oxo-4-styryl-1-p-tolylazetididin-3-yl)-2-phenylthiazolidin-4-one (4b)*: White solid; yield 82%; mp: 140-143 °C; <sup>1</sup>H NMR (300 MHz, CDCl<sub>3</sub>): δ 2.26 (s, 3H), 3.76 (d, *J* = 1.8 Hz, 1H), 3.77 (d, *J* = 1.2 Hz, 1H), 4.44 (dt, *J* = 5.7, 1.2 Hz, 1H), 4.54 (d, *J* = 5.7 Hz, 1H), 5.71 (s, 1H), 6.43 (d, *J* = 6.6 Hz, 2H), 7.04 (d, *J* = 8.4 Hz, 2H), 7.28-7.43 (m, 12H); <sup>13</sup>C NMR (CDCl<sub>3</sub>): δ 20.9, 32.6, 61.6, 64.1, 65.7, 117.0, 124.1, 126.8, 128.5, 128.5, 128.7, 128.8, 129.5, 129.8, 133.8, 135.2, 135.7, 137.5, 138.2, 161.4, 171.8; LRMS: 441.1 (M+1), HRMS calcd for C<sub>27</sub>H<sub>25</sub>N<sub>2</sub>O<sub>2</sub>S (MH<sup>+</sup>): 441.1637, found: 441.1640.

*2-(2,5-dimethylphenyl)-3-(2-oxo-4-styryl-1-p-tolylazetididin-3-yl)thiazolidin-4-one (4c)*: Pale yellow solid; yield 86%; mp: 145-150 °C; <sup>1</sup>H NMR (300 MHz, CDCl<sub>3</sub>): δ 2.21 (s, 3H), 2.26 (s, 3H), 2.32 (s, 3H), 3.74 (d, *J* = 1.5 Hz, 1H), 3.76 (d, *J* = 0.6 Hz, 1H), 4.51 (d, *J* = 5.4 Hz, 1H), 4.63-4.67 (m, 1H), 6.09 (s, 1H), 6.56-6.64 (m, 1H), 6.76 (d, *J* = 16.2 Hz, 1H), 7.05 (d, *J* = 8.1 Hz, 4H), 7.15 (s, 1H), 7.27-7.40 (m, 5H), 7.47 (d, *J* = 8.1 Hz, 2H); <sup>13</sup>C NMR (CDCl<sub>3</sub>): δ 18.6, 20.9, 21.0, 32.5, 60.0, 61.9, 64.2, 117.1, 124.5, 126.9, 128.6, 128.8, 129.5, 129.9, 130.9, 133.8, 135.2, 135.6, 136.3, 137.6, 161.6, 172.7; LRMS: 469.2 (M+1), HRMS calcd for C<sub>29</sub>H<sub>29</sub>N<sub>2</sub>O<sub>2</sub>S (MH<sup>+</sup>): 469.1950, found: 469.1954.

*2-(furan-2-yl)-3-(2-oxo-4-styryl-1-p-tolylazetididin-3-yl)thiazolidin-4-one (4d)*: White solid; yield 83%; mp: 178-182 °C; <sup>1</sup>H NMR (300 MHz, CDCl<sub>3</sub>): δ 2.27 (s, 3H), 3.65 (d, *J* = 15.6 Hz, 1H), 3.84 (d, *J* = 15.6 Hz, 1H), 4.63 (t, *J* = 5.4 Hz, 1H), 4.84 (d, *J* = 5.4 Hz, 1H), 5.65 (s, 1H), 6.17-

6.25 (m, 1H), 6.32-6.41 (m, 3H), 7.07 (d,  $J = 8.1$  Hz, 2H), 7.22-7.31 (m, 8H);  $^{13}\text{C}$  NMR ( $\text{CDCl}_3$ ):  $\delta$  20.9, 32.1, 57.8, 61.1, 64.3, 109.6, 110.7, 117.0, 123.0, 126.7, 128.3, 128.7, 129.5, 133.9, 135.2, 135.8, 136.2, 143.7, 151.0, 160.8, 171.1; LRMS: 431.1 (M+1), HRMS calcd for  $\text{C}_{25}\text{H}_{23}\text{N}_2\text{O}_3\text{S}$  ( $\text{MH}^+$ ): 431.1429, found: 431.1432.

*3-(2-oxo-4-styryl-1-p-tolylazetididin-3-yl)-2-(pyridin-2-yl)thiazolidin-4-one* (**4e**): White solid; yield 59%; mp: 215-218 °C;  $^1\text{H}$  NMR (300 MHz,  $\text{CDCl}_3$ ):  $\delta$  2.27 (s, 3H), 3.53 (d,  $J = 15.6$  Hz, 1H), 3.90 (dd,  $J = 15.6, 1.5$  Hz, 1H), 4.67 (d,  $J = 5.4$  Hz, 1H), 4.88 (dd,  $J = 8.1, 5.4$  Hz, 1H), 5.76 (s, 1H), 6.18 (dd,  $J = 16.2, 8.1$  Hz, 1H), 6.74 (d,  $J = 16.2$  Hz, 1H), 7.07 (dd,  $J = 8.1, 4.5$  Hz, 2H), 7.21-7.39 (m, 8H), 7.57 (d,  $J = 8.1$  Hz, 1H), 7.73 (dd,  $J = 8.1, 1.8$  Hz, 1H), 8.51 (t,  $J = 1.8$  Hz, 1H);  $^{13}\text{C}$  NMR ( $\text{CDCl}_3$ ):  $\delta$  20.9, 31.8, 60.6, 63.5, 64.2, 117.0, 121.1, 123.4, 123.9, 126.8, 128.7, 129.5, 134.0, 135.1, 135.6, 136.4, 137, 149.4, 159.0, 160.5, 172.7; LRMS: 442.2 (M+1), HRMS calcd for  $\text{C}_{26}\text{H}_{24}\text{N}_3\text{O}_2\text{S}$  ( $\text{MH}^+$ ): 442.1589, found: 442.1587.

*3-(1-(4-chlorophenyl)-2-oxo-4-styrylazetididin-3-yl)-2-phenylthiazolidin-4-one* (**4f**): White solid; yield 85%; mp: 214-220 °C;  $^1\text{H}$  NMR (300 MHz,  $\text{CDCl}_3$ ):  $\delta$  3.78 (d,  $J = 6$  Hz, 2H), 4.43 (t,  $J = 5.4$  Hz, 1H), 4.55 (d,  $J = 5.4$  Hz, 1H), 5.71 (s, 1H), 6.34-6.49 (m, 2H), 7.21 (d,  $J = 8.1$  Hz, 2H), 7.25-7.41 (m, 12H);  $^{13}\text{C}$  NMR ( $\text{CDCl}_3$ ):  $\delta$  32.6, 61.8, 64.2, 65.7, 118.2, 123.4, 126.8, 128.5, 128.7, 128.8, 128.9, 129.1, 129.2, 129.9, 135.5, 136.1, 137.9, 138.0, 161.7, 171.9; LRMS: 461.2 (M+1), HRMS calcd for  $\text{C}_{26}\text{H}_{22}\text{ClN}_2\text{O}_2\text{S}$  ( $\text{MH}^+$ ): 461.1091, found: 461.1087.

*3-(1-(4-chlorophenyl)-2-oxo-4-styrylazetididin-3-yl)-2-(2,5-dimethylphenyl)thiazolidin-4-one* (**4g**): Yellow solid; yield 84%; mp: 150-155 °C;  $^1\text{H}$  NMR (300 MHz,  $\text{CDCl}_3$ ):  $\delta$  2.20 (s, 3H), 2.32 (s, 3H), 3.69-3.83 (m, 2H), 4.49 (d,  $J = 5.7$  Hz, 1H), 4.64 (dd,  $J = 8.7, 5.7$  Hz, 1H), 6.09 (s, 1H), 6.55-6.63 (m, 1H), 6.86 (d,  $J = 15.6$  Hz, 1H), 7.05 (d,  $J = 0.9$  Hz, 2H), 7.15-7.35 (m, 8H), 7.37 (d,  $J = 1.8$  Hz, 2H);  $^{13}\text{C}$  NMR ( $\text{CDCl}_3$ ):  $\delta$  18.6, 21.0, 32.5, 62.2, 64.4, 68.0, 118.3, 123.9, 126, 128.8, 128.9, 129.1, 129.2, 130.0, 131.8, 133.5, 135.4, 136.1, 136.4, 138.1, 161.9, 172.7; LRMS: 489.0 (M+1), HRMS calcd for  $\text{C}_{28}\text{H}_{26}\text{ClN}_2\text{O}_2\text{S}$  ( $\text{MH}^+$ ): 489.1404, found: 489.1400.

*3-(1-(4-chlorophenyl)-2-oxo-4-styrylazetididin-3-yl)-2-(furan-2-yl)thiazolidin-4-one* (**4h**): White solid; yield 82%; mp: 216-222 °C;  $^1\text{H}$  NMR (300 MHz,  $\text{CDCl}_3$ ):  $\delta$  3.65 (d,  $J = 15.6$  Hz, 1H), 3.84 (dd,  $J = 15.6, 1.5$  Hz, 1H), 4.63 (t,  $J = 5.1$  Hz, 1H), 4.83 (d,  $J = 5.1$  Hz, 1H), 5.64 (d,  $J = 1.2$  Hz, 1H), 6.14-6.23 (m, 1H), 6.31-6.41 (m, 3H), 7.21-7.31 (m, 10H);  $^{13}\text{C}$  NMR ( $\text{CDCl}_3$ ):  $\delta$  32.1, 57.8,

61.1, 64.5, 109.7, 110.7, 118.3, 122.4, 126.7, 128.5, 128.7, 129.1, 129.3, 135.6, 136.1, 136.7, 143.7, 150.9, 161, 171.1; LRMS: 451.0 (M+1), HRMS calcd for C<sub>24</sub>H<sub>20</sub>ClN<sub>2</sub>O<sub>3</sub>S (MH<sup>+</sup>): 451.0883, found: 451.0885.

*3-(1-(4-chlorophenyl)-2-oxo-4-styrylazetid-3-yl)-2-(pyridin-2-yl)thiazolidin-4-one (4i)*: Brown solid; yield 57%; mp: 190-198 °C; <sup>1</sup>H NMR (300 MHz, CDCl<sub>3</sub>): δ 3.64 (d, *J* = 15.6 Hz, 1H), 3.87 (dd, *J* = 15.6, 1.8 Hz, 1H), 4.60 (bs, 1H), 5.07 (d, *J* = 5.1 Hz, 1H), 5.74 (d, *J* = 1.2 Hz, 1H), 6.20-6.32 (m, 2H), 7.20-7.35 (m, 10H), 7.39 (d, *J* = 7.8 Hz, 1H), 7.56 (dt, *J* = 7.8, 1.2 Hz, 1H), 8.50 (dd, *J* = 3.9, 0.9 Hz, 1H); <sup>13</sup>C NMR (CDCl<sub>3</sub>): δ 31.9, 61, 64.5, 65.7, 118.3, 121.6, 122.7, 123.8, 126.7, 128.6, 128.8, 129.1, 135.4, 136, 136.8, 137.2, 149.3, 158.7, 160.9, 172.2; LRMS: 462.1 (M+1), HRMS calcd for C<sub>25</sub>H<sub>21</sub>ClN<sub>3</sub>O<sub>2</sub>S (MH<sup>+</sup>): 462.1043, found: 462.1045.

*2-(2-nitrophenyl)-3-(2-oxo-4-styryl-1-p-tolylazetid-3-yl)thiazolidin-4-one (6a)*: Yellow solid; yield 86%; mp: 191-195 °C; <sup>1</sup>H NMR (300 MHz, CDCl<sub>3</sub>): δ 2.28 (s, 3H), 3.49 (d, *J* = 15.9 Hz, 1H), 3.68 (dd, *J* = 15.9, 1.2 Hz, 1H), 4.89 (dd, *J* = 5.4, 2.1 Hz, 1H), 5.28 (d, *J* = 4.8 Hz, 1H), 6.38 (dd, *J* = 15.9, 8.1 Hz, 1H), 6.47 (s, 1H), 6.79 (d, *J* = 15.1 Hz, 1H), 7.08 (d, *J* = 8.1 Hz, 2H), 7.26-7.53 (m, 9H), 7.63 (dd, *J* = 7.5, 0.9 Hz, 1H), 8.17 (dd, *J* = 7.5, 1.2 Hz, 1H); <sup>13</sup>C NMR (CDCl<sub>3</sub>): δ 20.9, 30.9, 59.8, 60.0, 64.1, 117.1, 122.4, 125.8, 126.8, 128.7, 128.8, 129.3, 129.6, 134.1, 134.5, 134.8, 135.5, 137.3, 137.4, 146.3, 159.7, 173.1; LRMS: 486.2 (M+1), HRMS calcd for C<sub>27</sub>H<sub>24</sub>N<sub>3</sub>O<sub>4</sub>S (MH<sup>+</sup>): 486.1488, found: 486.1479.

*3-(1-(4-fluorophenyl)-2-oxo-4-styrylazetid-3-yl)-2-(2-nitrophenyl)thiazolidin-4-one (6b)*: white solid; yield 90%; mp: 136-140 °C; <sup>1</sup>H NMR (300 MHz, CDCl<sub>3</sub>): δ 3.68 (d, *J* = 1.2 Hz, 1H), 3.74 (d, *J* = 1.2 Hz, 1H), 4.87 (dd, *J* = 7.8, 5.1 Hz, 1H), 5.25 (d, *J* = 5.1 Hz, 1H), 6.31-6.44 (m, 1H), 6.45 (s, 1H), 6.77 (d, *J* = 16.2 Hz, 1H), 6.97 (d, *J* = 8.7 Hz, 2H), 7.00-7.61 (m, 10H), 8.14 (dd, *J* = 7.8, 1.2 Hz, 1H); <sup>13</sup>C NMR (CDCl<sub>3</sub>): δ 31.0, 50.8, 59.9, 64.4, 115.8, 116.1, 118.6, 118.7, 121.8, 125.7, 126.8, 127.1, 128.8, 128.9, 129.4, 133.5, 134.1, 135.3, 137.8, 159.9, 173.1; LRMS: 490.1 (M+1), HRMS calcd for C<sub>26</sub>H<sub>21</sub>FN<sub>3</sub>O<sub>4</sub>S (MH<sup>+</sup>): 490.1237, found: 490.1241.

*2-(2-nitrophenyl)-3-(2-oxo-1-phenyl-4-styrylazetid-3-yl)thiazolidin-4-one (6c)*: Yellow solid; yield 82%; mp: 85-88 °C; <sup>1</sup>H NMR (300 MHz, CDCl<sub>3</sub>): δ 3.52 (d, *J* = 15.9 Hz, 1H), 3.70 (dd, *J* = 15.9, 1.2 Hz, 1H), 4.92 (dd, *J* = 7.8, 5.4 Hz, 1H), 5.30 (d, *J* = 4.8 Hz, 1H), 6.39 (dd, *J* = 15.9, 4.8 Hz, 1H), 6.48 (s, 1H), 6.81 (d, *J* = 15.9 Hz, 1H), 7.11 (t, *J* = 7.2 Hz, 2H), 7.27-7.64 (m, 11H),

8.18 (d,  $J = 7.2$  Hz, 1H);  $^{13}\text{C}$  NMR ( $\text{CDCl}_3$ ):  $\delta$  30.9, 59.9, 60.1, 64.2, 117.1, 122.1, 124.8, 125.8, 126.9, 128.8, 128.9, 129.2, 129.3, 134.1, 135.4, 137.2, 137.5, 160.0, 173.1; LRMS: 472.0 (M+1), HRMS calcd for  $\text{C}_{26}\text{H}_{22}\text{N}_3\text{O}_4\text{S}$  ( $\text{MH}^+$ ): 472.1331, found: 472.1333.

*3-(2-(4-methoxystyryl)-4-oxo-1-phenylazetid-3-yl)-2-(2-nitrophenyl)thiazolidin-4-one* (**6d**): Yellow solid; yield 79%; mp: 154-158 °C;  $^1\text{H}$  NMR (300 MHz,  $\text{CDCl}_3$ ):  $\delta$  3.54 (d,  $J = 15.9$  Hz, 1H), 3.67-3.72 (dd,  $J = 15.9, 1.2$  Hz, 1H), 3.94 (s, 3H), 4.89 (dd,  $J = 8.1, 4.8$  Hz, 1H), 5.22 (d,  $J = 4.8$  Hz, 1H), 6.42-6.50 (m, 2H), 6.99 (t,  $J = 7.5$  Hz, 2H), 7.11 (d,  $J = 6$  Hz, 2H), 7.28-7.32 (m, 3H), 7.41 (dd,  $J = 9, 1.2$  Hz, 2H), 7.52-7.63 (m, 3H), 7.65 (d,  $J = 6.6$  Hz, 1H), 8.17 (d,  $J = 8.1$  Hz, 1H);  $^{13}\text{C}$  NMR ( $\text{CDCl}_3$ ):  $\delta$  31.0, 55.4, 60.0, 60.9, 64.2, 110.0, 117.2, 120.8, 123.1, 124.6, 125.7, 127.2, 127.7, 129.1, 129.3, 129.8, 132.9, 134.1, 137.4, 146.4, 157.0, 160.2, 173.0; LRMS: 502.1 (M+1), HRMS calcd for  $\text{C}_{27}\text{H}_{24}\text{N}_3\text{O}_5\text{S}$  ( $\text{MH}^+$ ): 502.1437, found: 502.1434.

*2-(4,5-dimethoxy-2-nitrophenyl)-3-(2-oxo-4-styryl-1-p-tolylazetid-3-yl)thiazolidin-4-one* (**6e**): White solid; yield 80%; mp: 186-190 °C;  $^1\text{H}$  NMR (300 MHz,  $\text{CDCl}_3$ ):  $\delta$  2.27 (s, 3H), 3.48 (dd,  $J = 16.2, 6$  Hz, 1H), 3.67 (dd,  $J = 16.2, 5.4$  Hz, 1H), 3.85 (s, 3H), 3.97 (s, 3H), 4.90 (t,  $J = 5.4$  Hz, 1H), 5.40 (d,  $J = 5.1$  Hz, 1H), 6.28 (dd,  $J = 16.2, 7.5$  Hz, 1H), 6.62 (d,  $J = 5.7$  Hz, 1H), 6.74-6.83 (m, 2H), 7.08 (t,  $J = 5.1$  Hz, 2H), 7.24-7.45 (m, 7H), 7.74 (d,  $J = 6.6$  Hz, 1H);  $^{13}\text{C}$  NMR ( $\text{CDCl}_3$ ):  $\delta$  20.9, 30.9, 56.4, 56.5, 59.8, 61.9, 63.9, 108.0, 108.6, 117.1, 122.0, 126.9, 128.7, 128.8, 129.6, 132.0, 134.6, 134.7, 135.4, 137.3, 138.8, 148.7, 153.9, 159.6, 173.3; LRMS: 546.2 (M+1), HRMS calcd for  $\text{C}_{29}\text{H}_{28}\text{N}_3\text{O}_6\text{S}$  ( $\text{MH}^+$ ): 546.1699, found: 546.1697.

*3-(2-(4-methoxystyryl)-4-oxo-1-phenylazetid-3-yl)-2-(4,5-dimethoxy-2-nitrophenyl)thiazolidin-4-one* (**6f**): Pale yellow solid; yield 84%; mp: 139-142 °C;  $^1\text{H}$  NMR (300 MHz,  $\text{CDCl}_3$ ):  $\delta$  3.47-3.53 (m, 1H), 3.68 (dd,  $J = 15.9, 0.9$  Hz, 1H), 3.84 (s, 3H), 3.89 (s, 3H), 3.98 (s, 3H), 4.91 (dd,  $J = 7.8, 5.4$  Hz, 1H), 5.41 (d,  $J = 5.4$  Hz, 1H), 6.39 (dd,  $J = 16.2, 8.4$  Hz, 1H), 6.60 (d,  $J = 0.9$  Hz, 1H), 6.82 (s, 1H), 6.93 (dd,  $J = 16.2, 8.4$  Hz, 2H), 7.08 (t,  $J = 6.3$  Hz, 1H), 7.24-7.31 (m, 4H), 7.39 (dd,  $J = 8.4, 0.9$  Hz, 2H), 7.51 (dd,  $J = 7.5, 1.5$  Hz, 1H), 7.72 (s, 1H);  $^{13}\text{C}$  NMR ( $\text{CDCl}_3$ ):  $\delta$  31.0, 55.4, 56.4, 56.5, 59.9, 60.7, 64.0, 108.3, 108.5, 110.9, 117.2, 120.7, 122.6, 124.6, 127.7, 129.1, 129.8, 131.8, 132.8, 137.3, 137.3, 139.0, 148.7, 153.9, 157.1, 160.2, 173.2; LRMS: 562.2 (M+1), HRMS calcd for  $\text{C}_{29}\text{H}_{28}\text{N}_3\text{O}_7\text{S}$  ( $\text{MH}^+$ ): 562.1648, found: 562.1650.

2-(4,5-dimethoxy-2-nitrophenyl)-3-(2-oxo-1-phenyl-4-((E)-1-phenylprop-1-en-2-yl)azetid-3-yl)thiazolidin-4-one (**6g**): White solid; yield 82%; mp: 155-160 °C; <sup>1</sup>H NMR (300 MHz, CDCl<sub>3</sub>): δ 1.72 (s, 3H), 3.74 (s, 3H), 3.78 (d, *J* = 16.4 Hz, 1H), 3.87 (dd, *J* = 16.4, 1.5 Hz, 1H), 4.01 (s, 3H), 4.81 (d, *J* = 2.4 Hz, 1H), 4.87 (bs, 1H), 6.49 (s, 1H), 6.59 (bs, 1H), 7.01 (d, *J* = 5.1 Hz, 1H), 7.08 (t, *J* = 7.5 Hz, 2H), 7.20 (d, *J* = 6.9 Hz, 1H), 7.25-7.39 (m, 8H); <sup>13</sup>C NMR (CDCl<sub>3</sub>): δ 12.2, 32.0, 56.2, 56.6, 58.9, 64.4, 64.6, 108.0, 109.7, 116.9, 124.6, 127.4, 128.3, 128.9, 129.1, 129.4, 130.7, 132.1, 135.9, 137.5, 140.4, 149.1, 153.6, 161.2, 172.1; LRMS: 546.2 (M+1), HRMS calcd for C<sub>29</sub>H<sub>28</sub>N<sub>3</sub>O<sub>6</sub>S (MH<sup>+</sup>): 546.1699, found: 546.1694.

**General procedure for the preparation of 2-(4,5-disubstituted-2-aminophenyl)-3-(2-oxo-4-styryl-1-arylazetid-3-yl)thiazolidin-4-one 7a-g:** To a solution of compound **6** (0.2 g, 1 equiv.) in a mixture of ethanol and water (ratio 2:1; 6 mL) were added successively iron powder (4 equiv.) and NH<sub>4</sub>Cl (4 equiv.). The reaction mixture was heated at 60 °C for 4 hrs. The progress of the reaction was monitored by *tlc* considering **6** as a limiting reactant. After completion of reaction, excess of solvent was evaporated under reduced pressure and reaction mixture was extracted with DCM (3 X 50 mL). Combined organic layers were washed with water (50 mL) followed by brine solution (50 mL). The organic layer thus obtained was dried over anhydrous Na<sub>2</sub>SO<sub>4</sub> and concentrated to get crude product. The crude product was purified *via* column chromatography using 30-50% mixture of ethyl acetate in hexane as eluent to obtain **7** as pure compound.

2-(2-aminophenyl)-3-(2-oxo-4-styryl-1-*p*-tolylazetid-3-yl)thiazolidin-4-one (**7a**): White solid; yield 96%; mp: 155-159 °C; <sup>1</sup>H NMR (300 MHz, CDCl<sub>3</sub>): δ 2.28 (s, 3H), 3.69-3.89 (m, 2H), 4.55-4.63 (m, 2H), 5.94 (s, 1H), 6.44-6.62 (m, 3H), 6.76 (t, *J* = 7.5 Hz, 1H), 7.07 (d, *J* = 8.4 Hz, 2H), 7.18 (dd, *J* = 7.5, 1.8 Hz, 2H), 7.28-7.45 (m, 7H); <sup>13</sup>C NMR (CDCl<sub>3</sub>): δ 20.9, 32.4, 59.3, 61.7, 64.0, 117.0, 117.7, 118.8, 124.1, 126.8, 128.4, 128.7, 129.5, 130.5, 133.8, 135.8, 135.9, 137.2, 145.1, 161.6, 171.8; LRMS: 456.2 (M+1), HRMS calcd for C<sub>27</sub>H<sub>26</sub>N<sub>3</sub>O<sub>2</sub>S (MH<sup>+</sup>): 456.1746, found: 456.1743.

2-(2-aminophenyl)-3-(1-(4-fluorophenyl)-2-oxo-4-styrylazetid-3-yl)thiazolidin-4-one (**7b**): White solid; yield 95%; mp: 203-207 °C; <sup>1</sup>H NMR (300 MHz, DMSO-*d*<sub>6</sub>): δ 3.67 (d, *J* = 15.9 Hz, 1H), 3.78 (d, *J* = 15.9 Hz, 1H), 4.76 (d, *J* = 5.4 Hz, 1H), 4.79 (d, *J* = 5.4 Hz, 1H), 6.22 (s, 1H), 6.30 (dd, *J* = 15.9, 6.6 Hz, 2H), 6.63 (d, *J* = 7.8 Hz, 1H), 6.75 (d, *J* = 15.9 Hz, 1H), 7.01 (d, *J* =

7.8 Hz, 2H), 7.16 (d,  $J = 9.0$  Hz, 2H), 7.20-7.44 (m, 7H);  $^{13}\text{C}$  NMR (DMSO- $d_6$ ):  $\delta$  32.0, 59.6, 61.6, 64.5, 116.2, 116.5, 118.6, 118.7, 121.8, 124.1, 127.0, 128.8, 129.3, 129.6, 134.7, 136.3, 138.1, 146.4, 157.0, 162.1, 172.5; LRMS: 460.2 (M+1), HRMS calcd for  $\text{C}_{26}\text{H}_{23}\text{FN}_3\text{O}_2\text{S}$  (MH $^+$ ): 460.1495, found: 460.1491

*2-(2-aminophenyl)-3-(2-oxo-1-phenyl-4-styrylazetid-3-yl)thiazolidin-4-one (7c)*: White solid; yield 91%; mp: 158-162 °C;  $^1\text{H}$  NMR (300 MHz, DMSO- $d_6$ ):  $\delta$  3.68 (d,  $J = 15.9$  Hz, 1H), 3.73 (d,  $J = 15.9$  Hz, 1H), 4.78 (dd,  $J = 9, 5.7$  Hz, 1H), 4.90 (bs, 1H), 5.32 (bs, 2H), 6.23 (s, 1H), 6.30-6.42 (m, 2H), 6.65 (d,  $J = 7.8$  Hz, 1H), 6.76 (d,  $J = 15.9$  Hz, 1H), 6.96-7.07 (m, 3H), 7.31-7.46 (m, 9H);  $^{13}\text{C}$  NMR (DMSO- $d_6$ ):  $\delta$  31.8, 59.7, 61.4, 64.3, 116.2, 116.9, 121.8, 124.1, 124.7, 126.9, 128.7, 129.3, 129.6, 133, 136.3, 137.8, 138.2, 146.4, 162.3, 172.5; LRMS: 442.2 (M+1), HRMS calcd for  $\text{C}_{26}\text{H}_{24}\text{N}_3\text{O}_2\text{S}$  (MH $^+$ ): 442.1589, found: 442.1591.

*3-(2-(4-methoxystyryl)-4-oxo-1-phenylazetid-3-yl)-2-(2-aminophenyl)thiazolidin-4-one (7d)*: White solid; yield 83%; mp: 138-142 °C;  $^1\text{H}$  NMR (300 MHz,  $\text{CDCl}_3$ ):  $\delta$  3.63-3.83 (m, 2H), 3.95 (s, 3H), 4.55-4.65 (m, 2H), 5.98 (s, 1H), 6.49 (dd,  $J = 16.2, 9$  Hz, 1H), 6.65 (d,  $J = 8.1$  Hz, 1H), 6.76 (t,  $J = 7.5$  Hz, 1H), 6.94 (d,  $J = 7.8$  Hz, 2H), 7.06 (t,  $J = 7.5$  Hz, 2H), 7.18-7.33 (m, 5H), 7.42-7.49 (m, 3H);  $^{13}\text{C}$  NMR ( $\text{CDCl}_3$ ):  $\delta$  32.5, 55.5, 59.6, 62.3, 63.9, 110.9, 117.1, 117.5, 120.9, 124.1, 124.6, 124.9, 127.4, 129.0, 129.6, 130.6, 132.5, 138.3, 156.4, 162.3, 172.1; LRMS: 472.2 (M+1), HRMS calcd for  $\text{C}_{27}\text{H}_{26}\text{N}_3\text{O}_3\text{S}$  (MH $^+$ ): 472.1695, found: 472.1699.

*2-(2-amino-4,5-dimethoxyphenyl)-3-(2-oxo-4-styryl-1-p-tolylazetid-3-yl)thiazolidin-4-one (7e)*: Pale yellow solid; yield 85%; mp: 98-102 °C;  $^1\text{H}$  NMR (300 MHz,  $\text{CDCl}_3$ ):  $\delta$  2.22 (s, 3H), 3.70-3.79 (m, 2H), 3.93 (s, 3H), 4.00 (s, 3H), 4.45 (d,  $J = 5.7$  Hz, 1H), 5.00 (dd,  $J = 9, 5.7$  Hz, 1H), 6.28 (s, 1H), 6.45-6.53 (m, 1H), 6.92-6.97 (m, 2H), 7.12 (d,  $J = 7.5$  Hz, 1H), 7.20-7.48 (m, 9H);  $^{13}\text{C}$  NMR ( $\text{CDCl}_3$ ):  $\delta$  20.7, 31.8, 53.5, 53.9, 59.4, 60.9, 63.9, 102.3, 110.1, 116.9, 122.4, 127.3, 128.7, 129.1, 129.6, 131.8, 134.5, 134.8, 135.8, 137.3, 138.3, 148.8, 154.2, 160.9, 172.1; LRMS: 516.2 ; LRMS: 516.2 (M+1), HRMS calcd for  $\text{C}_{29}\text{H}_{30}\text{N}_3\text{O}_4\text{S}$  (MH $^+$ ): 516.1957, found: 516.1960.

*3-(2-(4-methoxystyryl)-4-oxo-1-phenylazetid-3-yl)-2-(2-amino-4,5-dimethoxyphenyl)thiazolidin-4-one (7f)*: Pale yellow solid; yield 87%; mp: 137-142 °C;  $^1\text{H}$  NMR (300 MHz,  $\text{CDCl}_3$ ):  $\delta$  3.55 (s, 3H), 3.63-3.71 (m, 2H), 3.82 (s, 3H), 3.85 (s, 3H), 4.52-4.59 (m, 2H), 5.98 (bs, 1H), 6.21 (s, 1H), 6.50 (dd,  $J = 16.2, 8.7$  Hz, 1H), 6.69 (s, 1H), 6.85-6.93 (m, 3H), 7.01 (t,  $J$

= 6.9 Hz, 1H), 7.20-7.27 (m, 4H), 7.38-7.44 (m, 4H) ;  $^{13}\text{C}$  NMR ( $\text{CDCl}_3$ ):  $\delta$  32.7, 55.4, 55.8, 56.4, 60.8, 62.3, 63.6, 101.9, 110.8, 117.1, 117.3, 120.8, 124.0, 124.5, 124.7, 127.3, 128.1, 129.01, 129.07, 129.6, 132.0, 137.8, 151.0, 156.5, 162.5, 170.0; LRMS: 532.2 ; LRMS: 532.2 (M+1), HRMS calcd for  $\text{C}_{29}\text{H}_{30}\text{N}_3\text{O}_5\text{S}$  ( $\text{MH}^+$ ): 532.1906, found: 532.1904.

*2-(2-amino-4,5-dimethoxyphenyl)-3-(2-oxo-1-phenyl-4-((E)-1-phenylprop-1-en-2-yl)azetidino-3-yl)thiazolidin-4-one (7g)*: Yellow semi-solid; yield 84%;  $^1\text{H}$  NMR (300 MHz,  $\text{CDCl}_3$ ):  $\delta$  1.47 (s, 3H), 3.41 (s, 3H), 3.80 (s, 3H), 3.83-3.89 (m, 2H), 4.18 (bs, 1H), 5.02 (d,  $J = 2.7$  Hz, 1H), 5.80 (bs, 2H), 6.64 (bs, 1H), 6.71 (s, 1H), 7.05 (t,  $J = 7.5$  Hz, 1H), 7.21-7.43 (m, 11H);  $^{13}\text{C}$  NMR ( $\text{DMSO-d}_6$ ):  $\delta$  11.4, 32.5, 53.4, 55.3, 56.6, 63.3, 64.9, 102.6, 117.0, 124.2, 127.2, 128.2, 128.3, 128.9, 129.0, 129.1, 131.1, 132.1, 136.6, 141.8, 151.1, 162.9, 170.7; LRMS: 516.2 ;LRMS: 516.2 (M+1), HRMS calcd for  $\text{C}_{29}\text{H}_{30}\text{N}_3\text{O}_4\text{S}$  ( $\text{MH}^+$ ): 516.1957, found: 516.1955.

**General procedure for the preparation of (3E,4Z)-3-((E)-3-arylallylidene)-1H-benzo[e][1,4]diazepin-2(3H)-one 8a-e**: To a solution of compound **7** (0.2 g, 1 equiv.) in methanol (5 mL) was added successively sodium methoxide (5 equiv.). The reaction mixture was stirred at room temperature for 60 hrs. The progress of the reaction was monitored by *tlc* considering **7** as a limiting reactant. After completion of reaction, the excess of solvent was evaporated under reduced pressure. The crude product thus obtained, was purified *via* column chromatography using 20-25% mixture of ethyl acetate in hexane as eluent to obtain **8** as pure compound.

*(3E,4Z)-3-((E)-3-phenylallylidene)-1H-benzo[e][1,4]diazepin-2(3H)-one (8a)*: Yellow solid; yield 86%; mp:78-83 °C;  $^1\text{H}$  NMR (300 MHz,  $\text{CDCl}_3$ ):  $\delta$  6.85 (t,  $J = 8.1$  Hz, 2H), 6.96 (d,  $J = 11.4$  Hz, 1H), 7.16 (t,  $J = 8.1$  Hz, 1H), 7.29-7.52 (m, 8H), 7.70 (bs, 1H), 8.28 (s, 1H);  $^{13}\text{C}$  NMR ( $\text{CDCl}_3$ ):  $\delta$  119.8, 123.1, 123.8, 125.1, 127.2, 128.5, 128.7, 131.7, 131.8, 132.8, 136.7, 136.8, 138.1, 138.3, 156.9, 169.1; LRMS: 275.1 (M+1), HRMS calcd for  $\text{C}_{18}\text{H}_{15}\text{N}_2\text{O}$  ( $\text{MH}^+$ ): 275.1184, found: 275.1179.

*(3E,4Z)-7,8-dimethoxy-3-((E)-3-phenylallylidene)-1H-benzo[e][1,4]diazepin-2(3H)-one (8b)*: Yellow solid; yield 82%; mp: 140-144 °C;  $^1\text{H}$  NMR (300 MHz,  $\text{CDCl}_3$ ):  $\delta$  3.94 (s, 3H), 4.03 (s, 3H), 6.62 (d,  $J = 8.1$  Hz, 2H), 6.98 (t,  $J = 6$  Hz, 2H), 7.24-7.38 (m, 6H), 7.75 (bs, 1H), 8.34 (s, 1H);  $^{13}\text{C}$  NMR ( $\text{CDCl}_3$ ):  $\delta$  52.6, 52.7, 109.3, 109.8, 119.9, 123.8, 125.8, 127.2, 128.5, 128.7,



131.1, 131.7, 132.1, 136.7, 136.8, 138.3, 138.7, 156.9, 169.2; LRMS: 335.2 (M+1), HRMS calcd for C<sub>20</sub>H<sub>19</sub>N<sub>2</sub>O<sub>3</sub> (MH<sup>+</sup>): 335.1396, found: 335.1393.

*(3E,4Z)*-3-((*E*)-3-(4-methoxyphenyl)allylidene)-1*H*-benzo[*e*][1,4]diazepin-2(3*H*)-one (**8c**): Yellow solid; yield 85%; mp: 120-123 °C; <sup>1</sup>H NMR (300 MHz, CDCl<sub>3</sub>): δ 3.86 (s, 3H), 6.85-6.98 (m, 3H), 7.14 (t, *J* = 7.2 Hz, 1H), 7.22-7.28 (m, 2H), 7.36-7.46 (m, 3H), 7.51-7.64 (m, 2H), 7.81 (bs, 1H), 8.26 (s, 1H); <sup>13</sup>C NMR (CDCl<sub>3</sub>): δ 55.5, 110.6, 118.8, 121.2, 123.1, 124.1, 125.1, 127.2, 129.2, 129.7, 131.7, 132.8, 136.7, 138.1, 144.2, 157.2, 170.0; LRMS: 305.1 (M+1), HRMS calcd for C<sub>19</sub>H<sub>17</sub>N<sub>2</sub>O<sub>2</sub> (MH<sup>+</sup>): 305.1290, found: 305.1293.

*(3E,4Z)*-7,8-dimethoxy-3-((*E*)-3-(4-methoxyphenyl)allylidene)-1*H*-benzo[*e*][1,4]diazepin-2(3*H*)-one (**8d**): Yellow solid; yield 88%; mp: 166-169 °C; <sup>1</sup>H NMR (300 MHz, CDCl<sub>3</sub>): δ 3.86 (s, 3H), 3.89 (s, 3H), 3.93 (s, 3H), 6.50 (s, 1H), 6.81 (s, 1H), 6.88-6.95 (m, 3H), 7.17-7.25 (m, 2H), 7.52 (dd, *J* = 15.9, 11.4 Hz, 1H), 7.62 (d, *J* = 7.2 Hz, 1H), 8.15 (s, 1H), 8.75 (bs, 1H); <sup>13</sup>C NMR (CDCl<sub>3</sub>): δ 55.5, 56.2, 102.9, 110.9, 112.7, 117.7, 120.6, 123.4, 125.4, 126.8, 129.6, 131.4, 131.6, 132.5, 137.8, 145.2, 152.7, 156.2, 157.1, 169.1; LRMS: 365.2 (M+1), HRMS calcd for C<sub>21</sub>H<sub>21</sub>N<sub>2</sub>O<sub>4</sub> (MH<sup>+</sup>): 365.1501, found: 365.1504.

*(3E,4Z)*-7,8-dimethoxy-3-((*E*)-4-phenylbut-3-en-2-ylidene)-1*H*-benzo[*e*][1,4]diazepin-2(3*H*)-one (**8e**): Yellow solid; yield 73%; mp: 140-144 °C; <sup>1</sup>H NMR (300 MHz, CDCl<sub>3</sub>): δ 1.44 (s, 3H), 3.91 (s, 3H), 3.93 (s, 3H), 6.58 (s, 1H), 6.74 (s, 1H), 6.85 (s, 1H), 7.24-7.36 (m, 6H), 8.24 (s, 1H), 8.41 (bs, 1H); <sup>13</sup>C NMR (CDCl<sub>3</sub>): δ 14.1, 56.2, 56.3, 103.1, 107.6, 112.0, 118.7, 121.2, 125.0, 126.8, 128.1, 129.2, 129.3, 131.4, 136.5, 145.4, 152.5, 156.6, 169.7; LRMS: 349.1 (M+1), HRMS calcd for C<sub>21</sub>H<sub>21</sub>N<sub>2</sub>O<sub>3</sub> (MH<sup>+</sup>): 349.1552, found: 349.1550.

**General procedure for the preparation of methyl 2-(4-oxo-2-arylthiazolidin-3-yl)-5-phenylpenta-2,4-dienoate 9a-g:** To a solution of compound **4** (0.2 g, 1 equiv.) in methanol (5 mL) was added sodium methoxide (3 equiv.). The reaction mixture was stirred at room temperature for 36 hrs. The progress of the reaction was monitored by *tlc* considering **4** as a limiting reactant. After completion of reaction, the excess of solvent was evaporated under reduced pressure to obtain crude product. The crude product was purified *via* column chromatography using 20-25% mixture of ethyl acetate in hexane as eluent to obtain **9** as pure compound.

(2*Z*,4*E*)-methyl-2-(2-(4-methoxyphenyl)-4-oxothiazolidin-3-yl)-5-phenylpenta-2,4-dienoate (**9a**): Pale yellow solid; yield 91%; mp: 149-154 °C: <sup>1</sup>H NMR (300 MHz, CDCl<sub>3</sub>): δ 3.65 (s, 3H), 3.76 (s, 3H), 3.90 (d, *J* = 1.5 Hz, 1H), 3.91 (d, *J* = 1.2 Hz, 1H), 6.05 (s, 1H), 6.63 (d, *J* = 11.1 Hz, 1H), 6.76 (dd, *J* = 15.6, 1.8 Hz, 2H), 6.82 (d, *J* = 15.6 Hz, 1H), 7.33-7.43 (m, 8H); <sup>13</sup>C NMR (CDCl<sub>3</sub>): δ 33.5, 52.4, 55.2, 64.4, 113.8, 121.8, 124.1, 127.6, 128.5, 128.8, 129.6, 130.1, 135.7, 142.1, 142.8, 160.4, 163.9, 171.5; LRMS: 396.2 (M+1); HRMS calcd for C<sub>22</sub>H<sub>22</sub>NO<sub>4</sub>S (MH<sup>+</sup>): 396.1270 found 396.1275.

(2*Z*,4*E*)-methyl 2-(4-oxo-2-phenylthiazolidin-3-yl)-5-phenylpenta-2,4-dienoate (**9b**): white solid; yield 88%; mp: 121-124 °C: <sup>1</sup>H NMR (300 MHz, CDCl<sub>3</sub>): δ 3.77 (s, 3H), 3.94 (s, 2H), 6.09 (s, 1H), 6.64 (dd, *J* = 15.6, 11.1 Hz, 1H), 6.82 (d, *J* = 15.6 Hz, 1H), 7.24-7.47 (m, 11H); <sup>13</sup>C NMR (CDCl<sub>3</sub>): δ 33.4, 52.3, 64.7, 121.8, 124, 127.6, 128.2, 128.5, 128.7, 128.8, 129.6, 135.7, 136.9, 142.2, 142.9, 163.9, 171.5; LRMS: 366.1 (M+1); HRMS calcd for C<sub>21</sub>H<sub>20</sub>NO<sub>3</sub>S (MH<sup>+</sup>) 366.1164 found 366.1170.

(2*Z*,4*E*)-methyl 2-(2-(2,5-dimethylphenyl)-4-oxothiazolidin-3-yl)-5-phenylpenta-2,4-dienoate (**9c**): yellow solid; yield 84%; mp: 170-174 °C: <sup>1</sup>H NMR (300 MHz, CDCl<sub>3</sub>): δ 2.13 (s, 3H), 2.26 (s, 3H), 3.76 (s, 3H), 3.92 (d, *J* = 1.2 Hz, 1H), 3.93 (d, *J* = 1.2 Hz, 1H), 6.48 (s, 1H), 6.72-6.94 (m, 4H), 7.35-7.45 (m, 7H); <sup>13</sup>C NMR (CDCl<sub>3</sub>): δ 18.4, 20.9, 33.5, 52.4, 64.7, 115.2, 122.0, 124.0, 127.6, 128.8, 129.2, 129.6, 129.7, 129.8, 130.4, 133.4, 134.6, 135.7, 136.0, 142.1, 142.9, 164.0, 171.8; LRMS: 394.1 (M+1); HRMS calcd for C<sub>23</sub>H<sub>24</sub>NO<sub>3</sub>S (MH<sup>+</sup>): 394.1477 found 394.1475.

X-Ray crystal data and structure refinement for **9c**. CCDC 1429502 contains the supplementary crystallographic data for this Note. C<sub>23</sub>H<sub>23</sub>NO<sub>3</sub>S, *V* = 1959.1(2) Å<sup>3</sup> *Mr* = 393.48, *Z* = 4, orthorhombic, *a* = 7.2967(5) Å, *b* = 18.0150(13) Å, *T* = 100(2) K, *c* = 15.0313(11) Å, *α* = 90, *β* = 97.477(2), *γ* = 90; *T*<sub>min</sub> = 0.959, *T*<sub>max</sub> = 0.963, *R*<sub>int</sub> = 0.0277(3403) measured reflections, *wR*(*F*<sub>2</sub>) = 0.0704 (3540), *S* = 1.053.

(2*Z*,4*E*)-methyl 2-(2-(furan-2-yl)-4-oxothiazolidin-3-yl)-5-phenylpenta-2,4-dienoate (**9d**): Orange solid; yield 85%; mp: 156-160 °C: <sup>1</sup>H NMR (300 MHz, CDCl<sub>3</sub>): δ 3.80 (s, 3H), 3.87 (d, *J* = 9 Hz, 1H), 4.01 (dd, *J* = 15.6, 1.5 Hz, 1H), 5.95 (s, 1H), 6.21 (dd, *J* = 3.3, 1.5 Hz, 1H), 6.37 (d, *J* = 3.3 Hz, 1H), 6.67 (dd, *J* = 15.6, 11.1 Hz, 1H), 6.87 (d, *J* = 15.6 Hz, 1H), 7.30-7.43 (m, 7H);

$^{13}\text{C}$  NMR ( $\text{CDCl}_3$ ):  $\delta$  33.1, 52.1, 59.1, 108.1, 110.7, 113.6, 122.1, 123.6, 127.7, 128.8, 129.2, 130.2, 135.7, 142.5, 151.1, 164.2, 170.2; LRMS: 356.1 (M+1); HRMS calcd for  $\text{C}_{19}\text{H}_{18}\text{NO}_4\text{S}$  (MH<sup>+</sup>): 356.0957 found 356.0960.

(2Z,4E)-methyl 5-(4-methoxyphenyl)-2-(2-(2-nitrophenyl)-4-oxothiazolidin-3-yl)penta-2,4-dienoate (**9e**): Yellow solid; yield 81%; mp: 133-136 °C:  $^1\text{H}$  NMR (300 MHz,  $\text{CDCl}_3$ ):  $\delta$  3.76 (s, 3H), 3.80-3.86 (m, 1H), 3.90 (s, 3H), 3.96 (dd,  $J = 15.9, 1.2$  Hz, 1H), 6.67 (t,  $J = 9.3$  Hz, 2H), 6.73 (d,  $J = 7.5$  Hz, 1H), 6.89-6.98 (m, 2H), 7.15 (dd,  $J = 8.1, 7.5$  Hz, 2H), 7.41-7.49 (m, 2H), 7.61 (t,  $J = 9.3$  Hz, 1H), 7.84 (dd,  $J = 8.1, 1.2$  Hz, 1H), 8.1 (d,  $J = 4.8$  Hz, 1H);  $^{13}\text{C}$  NMR ( $\text{CDCl}_3$ ):  $\delta$  32.5, 52.4, 55.5, 59.0, 111.1, 115.3, 118.5, 120.9, 124.4, 124.7, 127.1, 129.2, 129.7, 129.9, 131.1, 133.3, 139.6, 142.7, 146.3, 158.0, 163.7, 171.7; LRMS: 441.1 (M+1); HRMS calcd for  $\text{C}_{22}\text{H}_{21}\text{N}_2\text{O}_6\text{S}$  (MH<sup>+</sup>) 441.1120 found 441.1125.

(2Z,4E)-methyl 2-(2-(4,5-dimethoxy-2-nitrophenyl)-4-oxothiazolidin-3-yl)-5-(4-methoxyphenyl)penta-2,4-dienoate (**9f**): yellow semi-solid; yield 84 %:  $^1\text{H}$  NMR (300 MHz,  $\text{CDCl}_3$ ):  $\delta$  3.77 (s, 3H), 3.83 (s, 3H), 3.87-3.91 (m, 2H), 3.92 (s, 3H), 3.94 (s, 3H), 6.44 (d,  $J = 7.5$  Hz, 1H), 6.70 (d,  $J = 7.5$  Hz, 1H), 6.85-6.92 (m, 2H), 7.05-7.46 (m, 6H);  $^{13}\text{C}$  NMR ( $\text{CDCl}_3$ ):  $\delta$  32.9, 53.1, 54.5, 54.8, 56.1, 61.0, 108.1, 109.0, 110.8, 118.1, 121.0, 124.2, 127.1, 128.0, 129.7, 130.3, 132.6, 139.6, 146.3, 151.9, 157.2, 162.8, 170.2; LRMS: 501.1 (M+1); HRMS calcd for  $\text{C}_{24}\text{H}_{25}\text{N}_2\text{O}_8\text{S}$  (MH<sup>+</sup>) 501.1332 found 501.1328.

(2Z,4E)-methyl 2-(2-(2-amino-4,5-dimethoxyphenyl)-4-oxothiazolidin-3-yl)-5-(4-methoxyphenyl)penta-2,4-dienoate (**9g**): pale yellow solid; yield 48 %; mp: 143-146 °C:  $^1\text{H}$  NMR (300 MHz,  $\text{CDCl}_3$ ):  $\delta$  3.63 (s, 3H), 3.71 (s, 3H), 3.77 (s, 3H), 3.81 (m, 1H), 3.86 (s, 3H), 3.99 (m, 1H), 6.11 (s, 1H), 6.39 (bs, 1H), 6.73 (bs, 1H), 6.87-7.05 (m, 3H), 7.22 (s, 1H), 7.31-7.34 (m, 1H), 7.49 (d,  $J = 11.1$  Hz, 1H), 7.55 (dd,  $J = 7.8$  Hz, 1H);  $^{13}\text{C}$  NMR ( $\text{CDCl}_3$ ):  $\delta$  33.5, 52.3, 55.5, 55.6, 56.2, 61.1, 101.7, 110.3, 111.0, 120.6, 122.9, 123.2, 124.9, 127.6, 130.7, 137.8, 140.2, 142.0, 143.1, 150.6, 157.6, 164.5, 171.1; LRMS: 471.2 (M+1); HRMS calcd for  $\text{C}_{24}\text{H}_{27}\text{N}_2\text{O}_6\text{S}$  (MH<sup>+</sup>) 471.1590 found 471.1593.

## Characterization data:

# <sup>1</sup>H NMR AND <sup>13</sup>C NMR SPECTRA

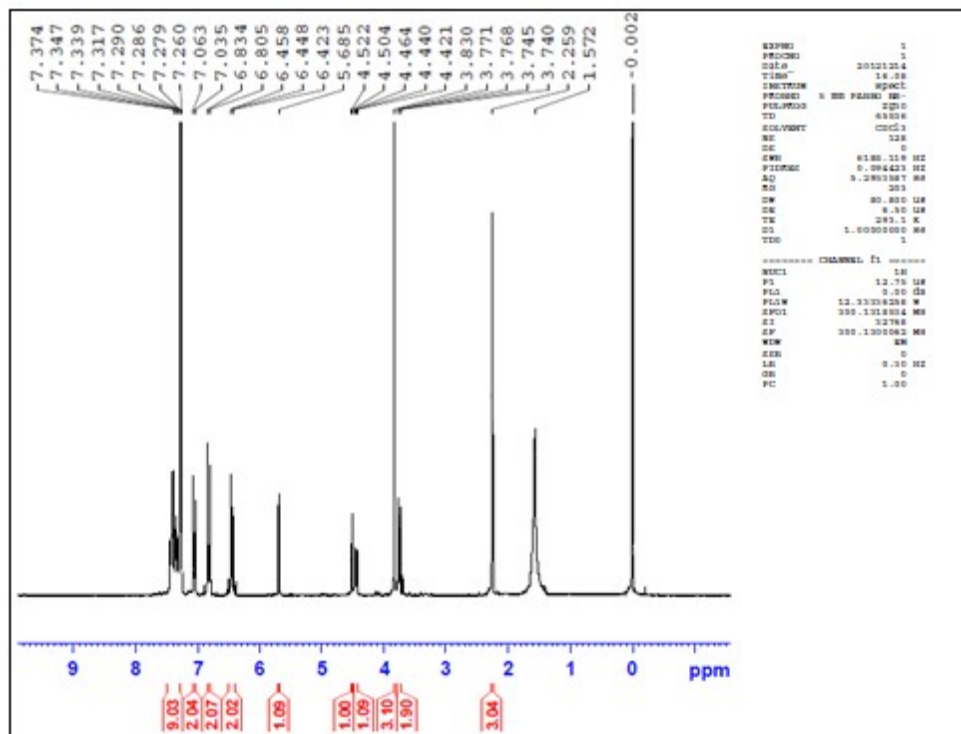

Figure S 1. <sup>1</sup>H NMR (300 MHz, CDCl<sub>3</sub>) of 4a.

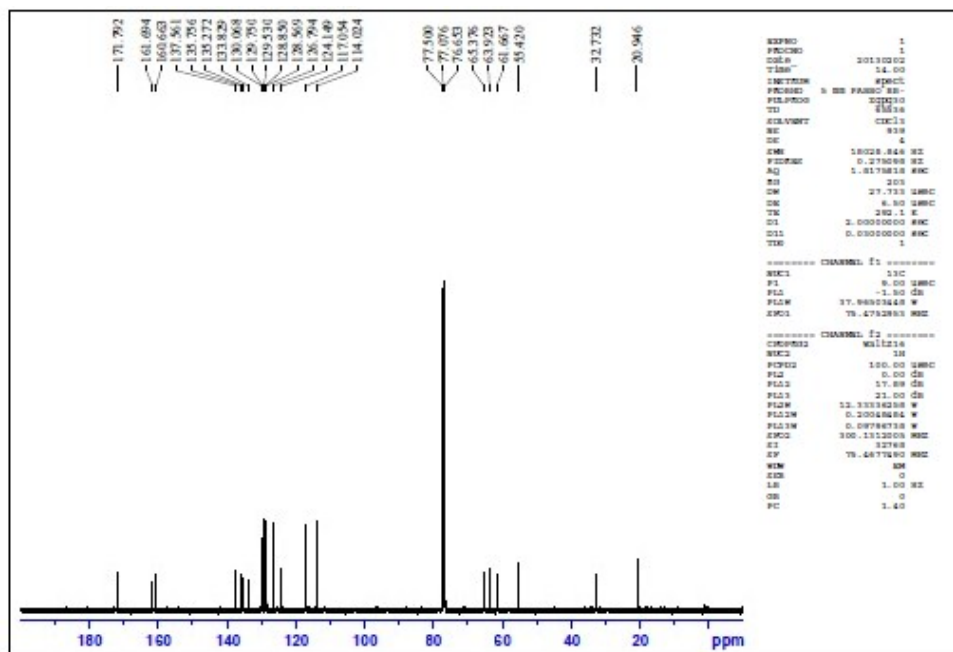

Figure S 2. <sup>13</sup>C NMR (75 MHz, CDCl<sub>3</sub>) of 4a.

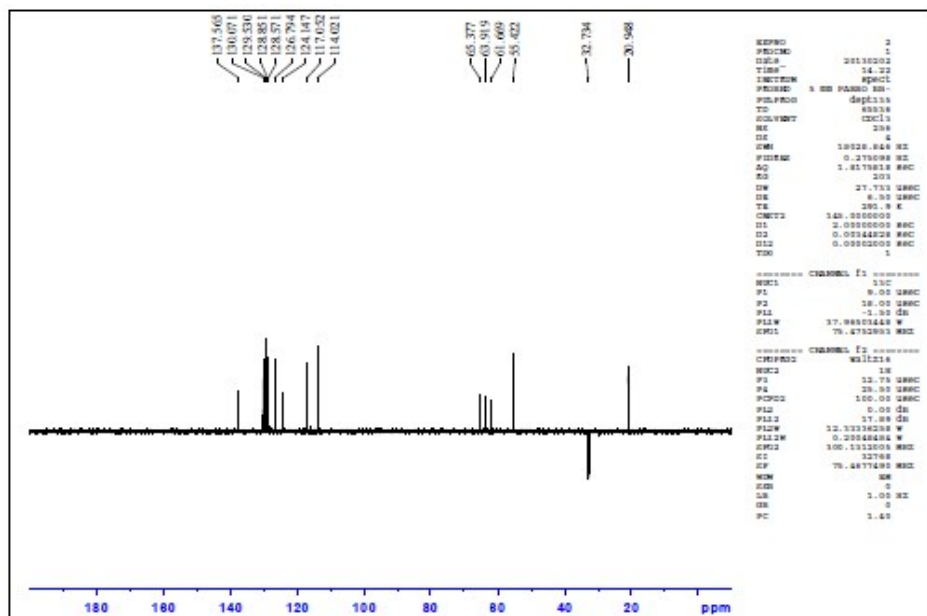

Figure S 3. DEPT NMR (75 MHz, CDCl<sub>3</sub>) of 4a.

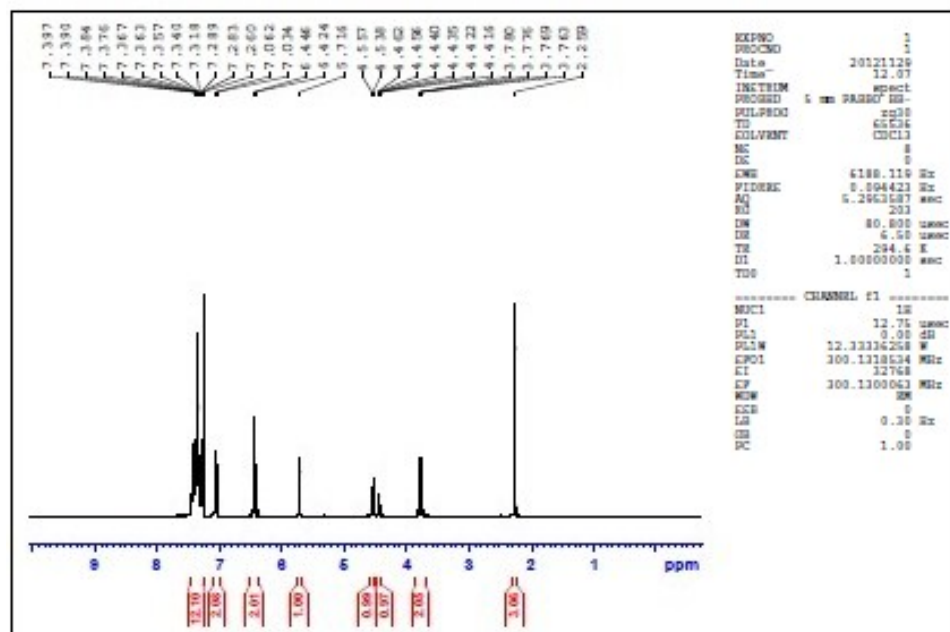

Figure S 4. <sup>1</sup>H NMR (300 MHz, CDCl<sub>3</sub>) of 4b.

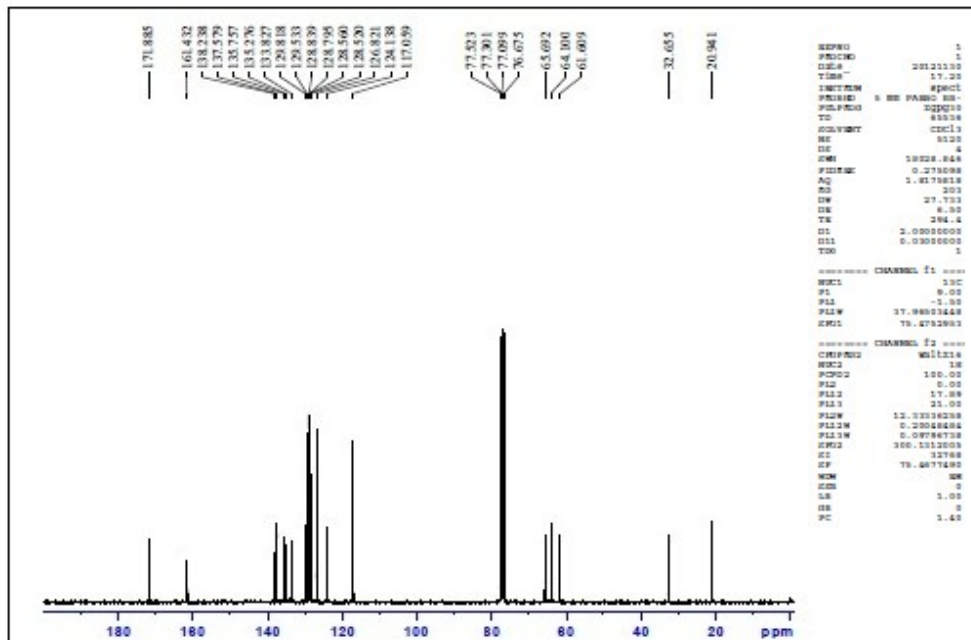

Figure S 5.  $^{13}\text{C}$  NMR (75 MHz,  $\text{CDCl}_3$ ) of **4b**.

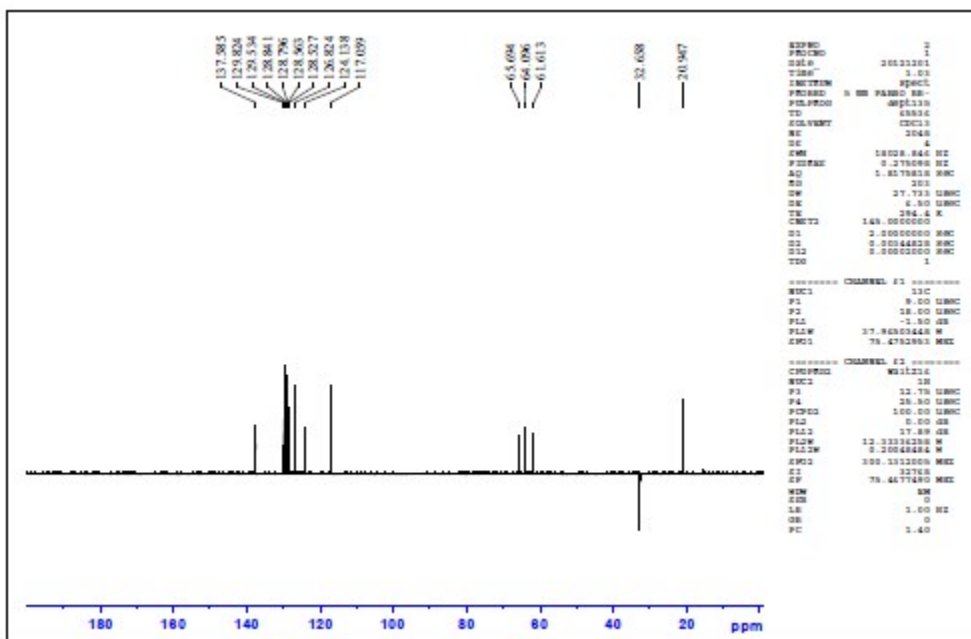

Figure S 6. DEPT NMR (75 MHz,  $\text{CDCl}_3$ ) of **4b**.

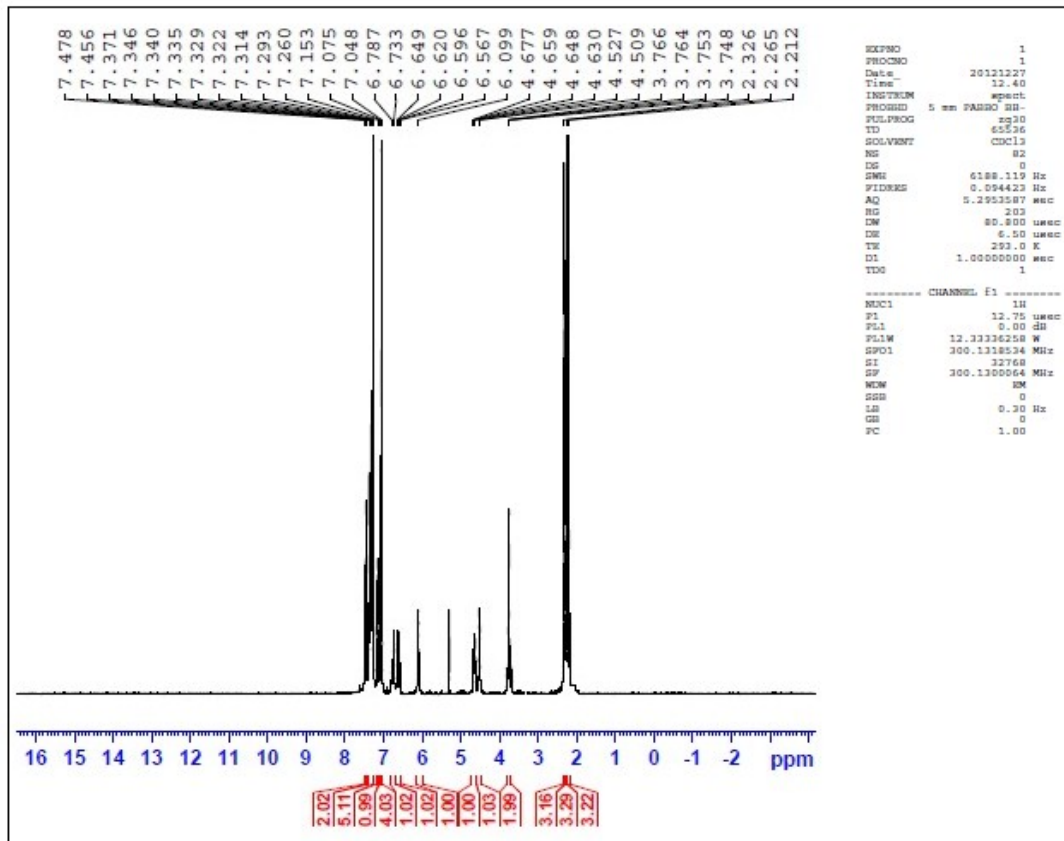

Figure S 7.  $^1\text{H}$  NMR (300 MHz,  $\text{CDCl}_3$ ) of **4c**.

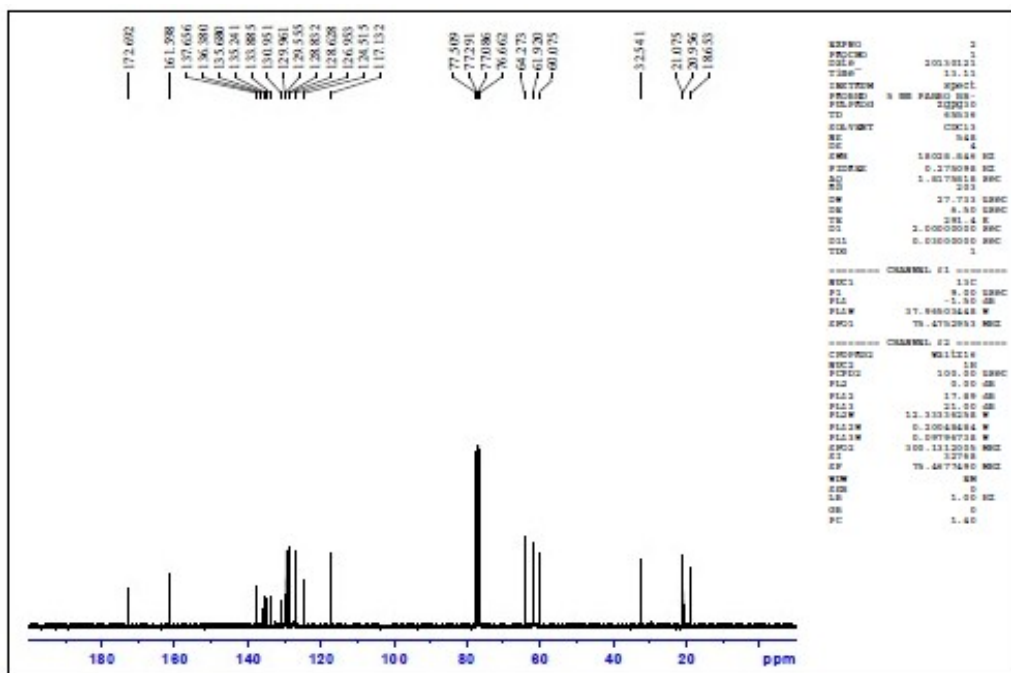

Figure S 8.  $^{13}\text{C}$  NMR (75 MHz,  $\text{CDCl}_3$ ) of **4c**.

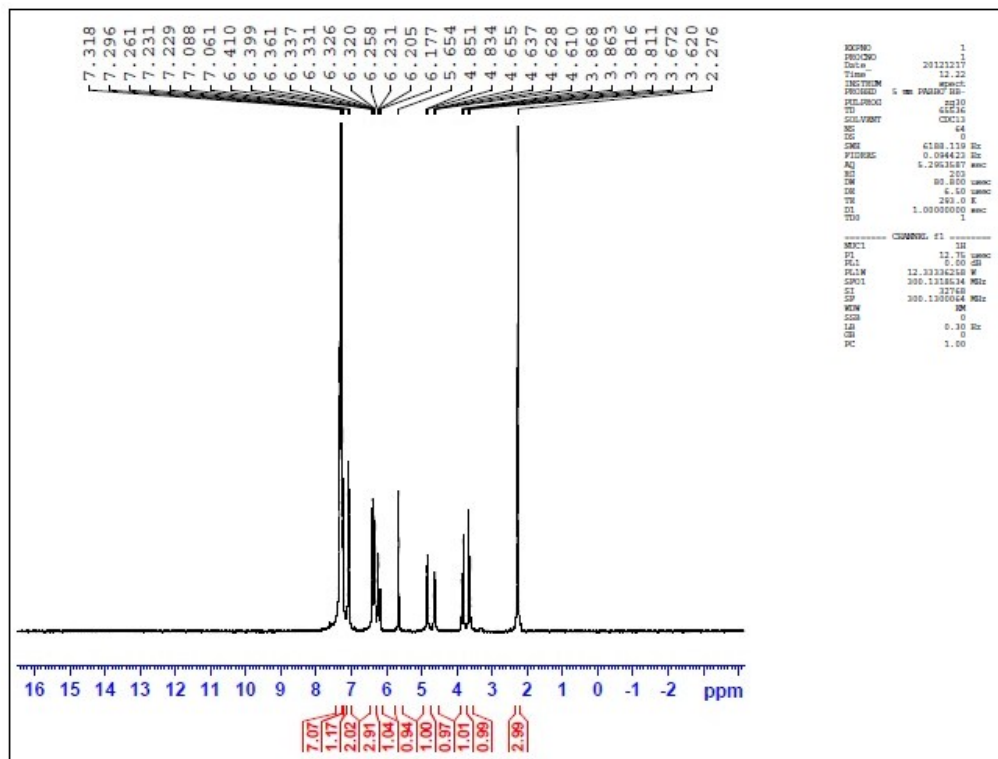

Figure S 9.  $^1\text{H}$  NMR (300 MHz,  $\text{CDCl}_3$ ) of 4d.

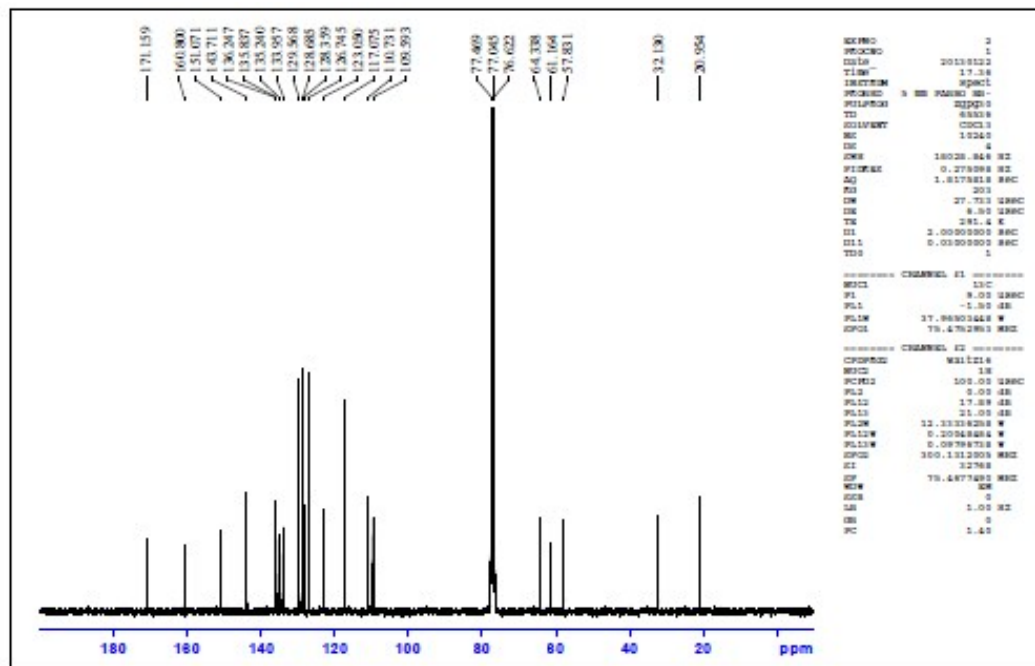

Figure S 10.  $^{13}\text{C}$  NMR (75 MHz,  $\text{CDCl}_3$ ) of 4d.







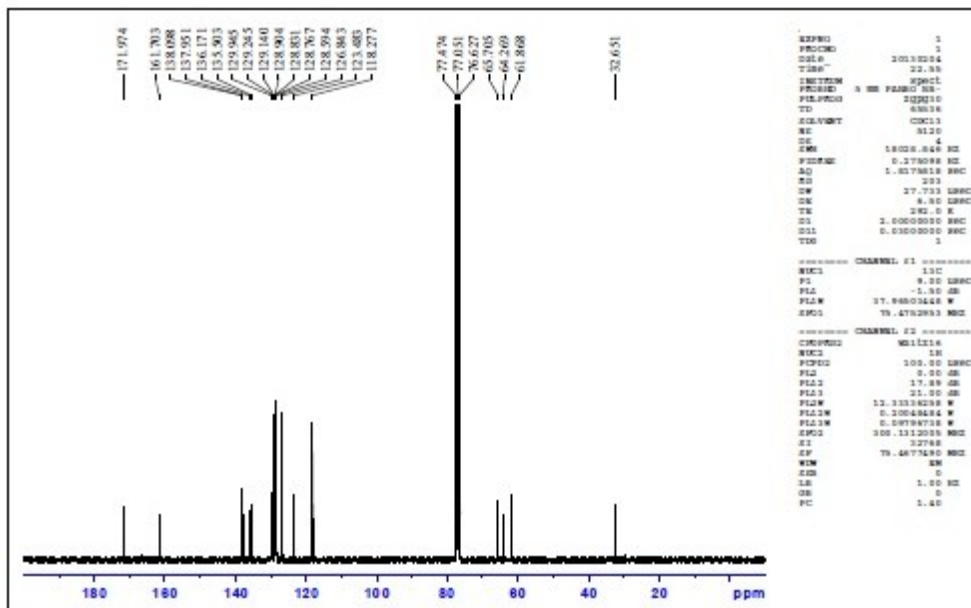

Figure S 15.  $^{13}\text{C}$  NMR (75 MHz,  $\text{CDCl}_3$ ) of **4f**.

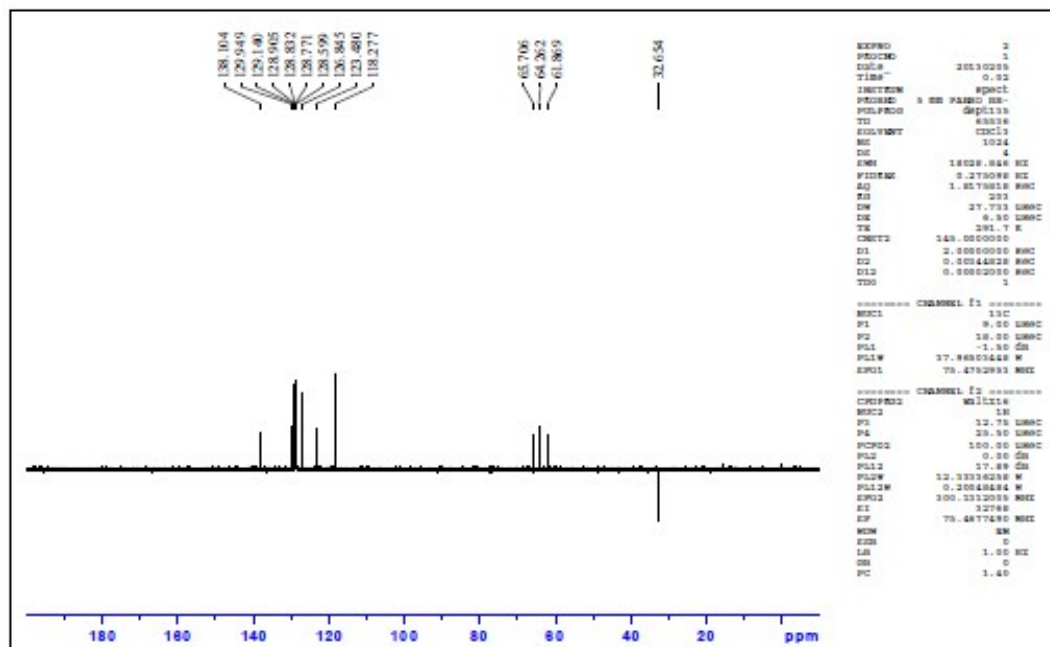

Figure S 16. DEPT NMR (75 MHz,  $\text{CDCl}_3$ ) of **4f**.

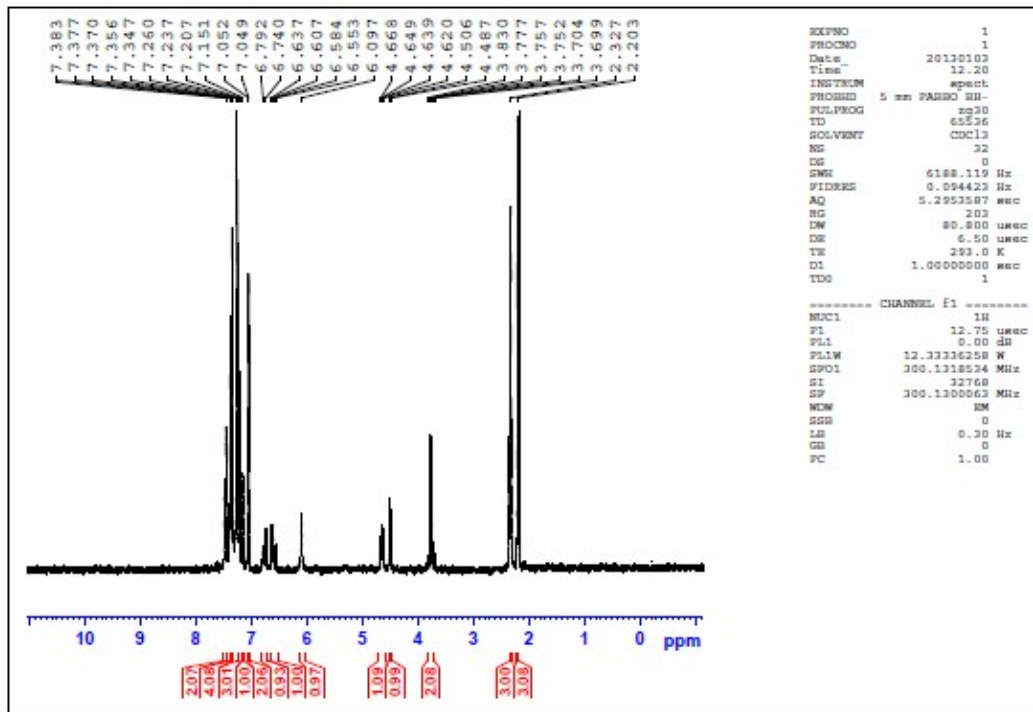

Figure S 17.  $^1\text{H}$  NMR (300 MHz,  $\text{CDCl}_3$ ) of **4g**.

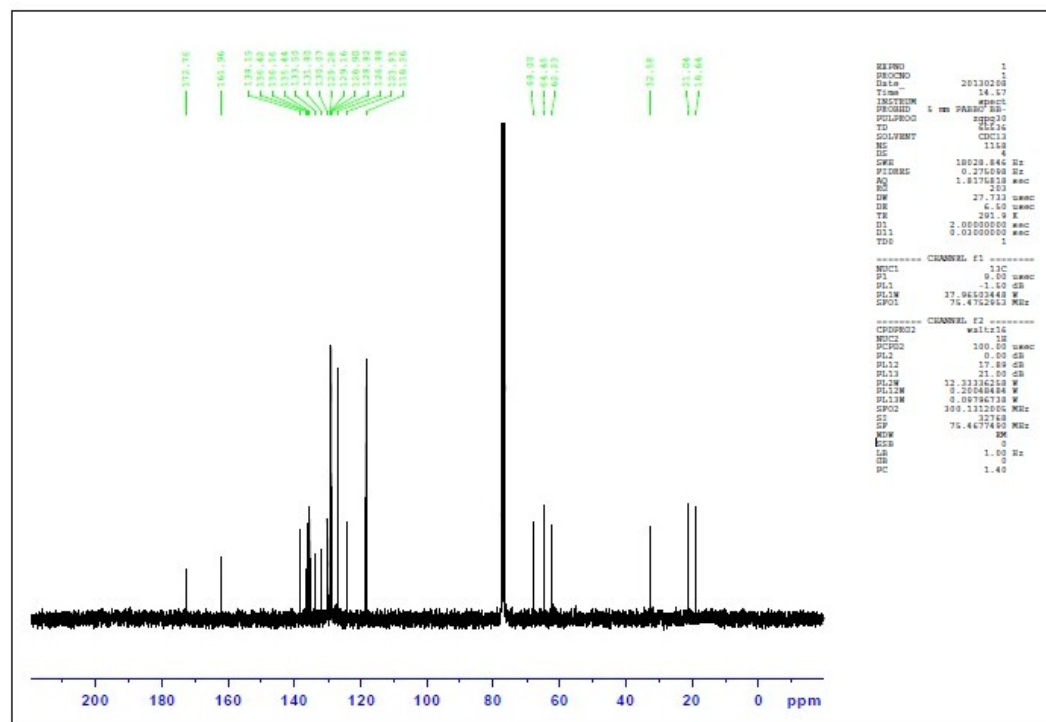

Figure S 18.  $^{13}\text{C}$  NMR (75 MHz,  $\text{CDCl}_3$ ) of **4g**.

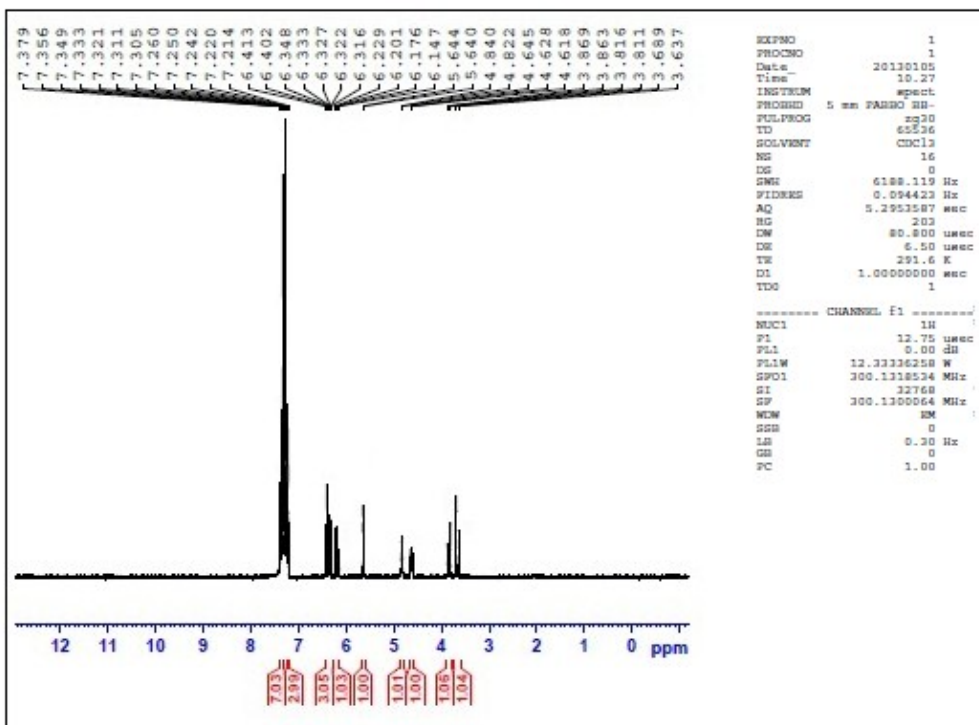

Figure S 19.  $^1\text{H}$  NMR (300 MHz,  $\text{CDCl}_3$ ) of 4h.

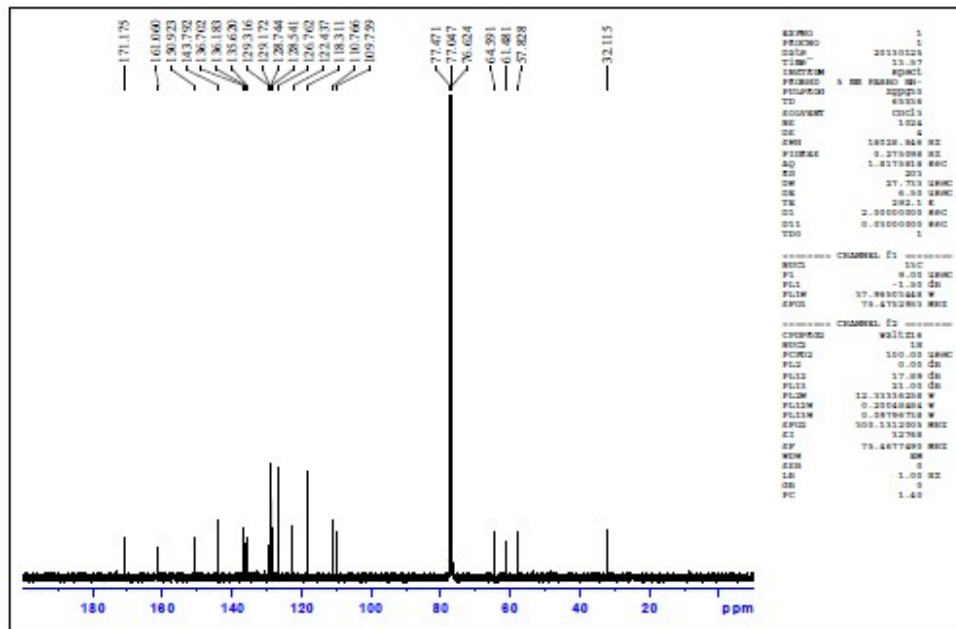

Figure S 20.  $^{13}\text{C}$  NMR (75 MHz,  $\text{CDCl}_3$ ) of 4h.

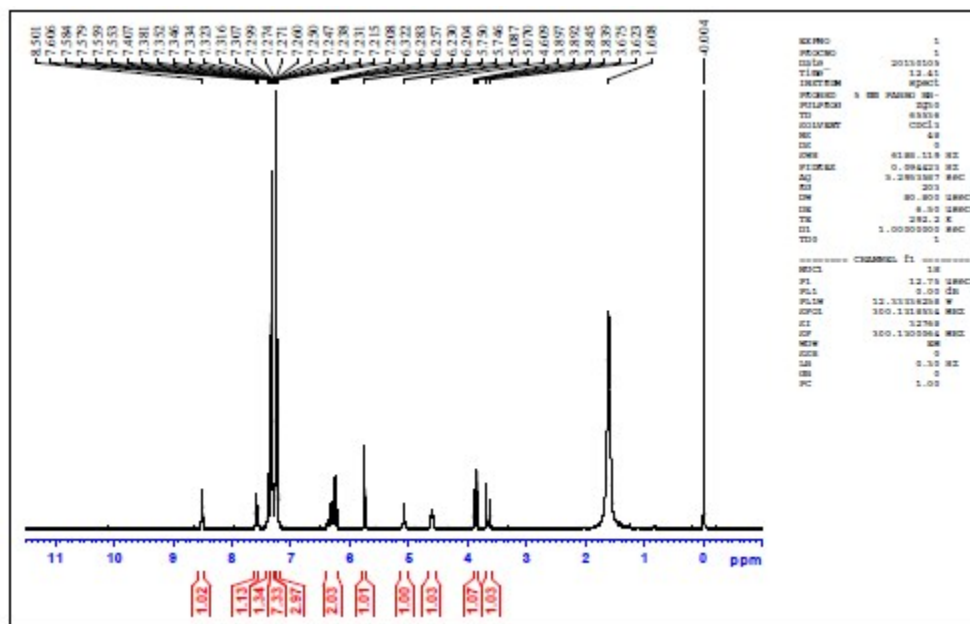

Figure S 21.  $^1\text{H}$  NMR (300 MHz,  $\text{CDCl}_3$ ) of **4i**.

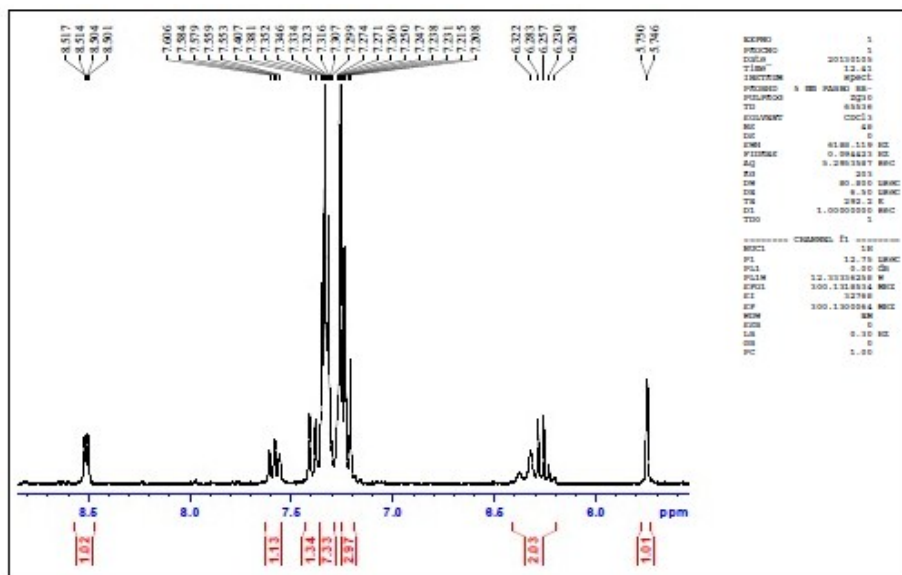

Figure S 22.  $^1\text{H}$  NMR (300 MHz,  $\text{CDCl}_3$ ) of **4i** expansion.

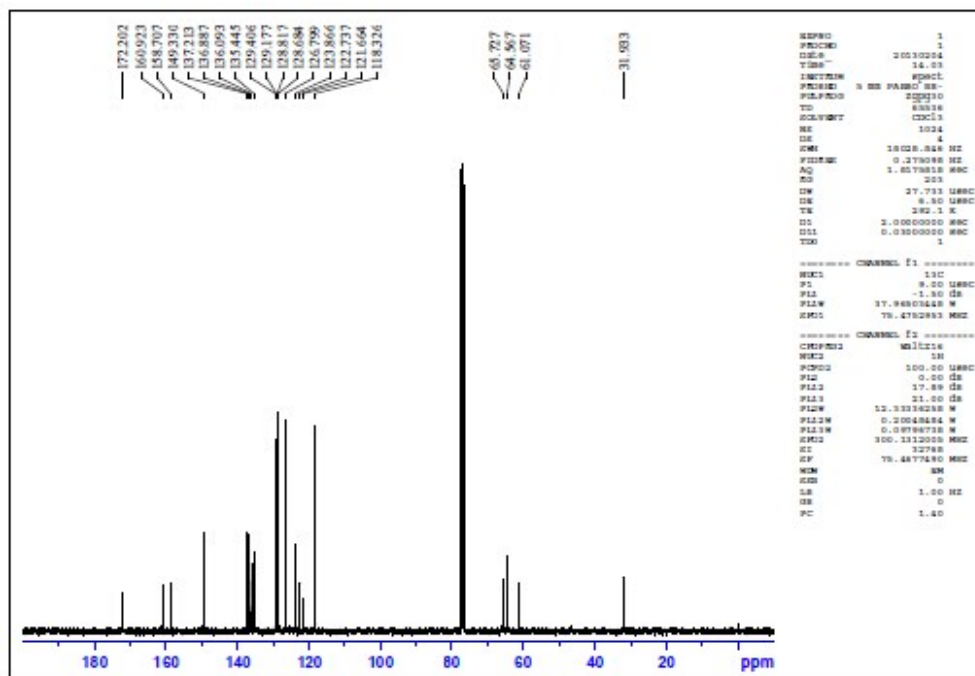

Figure S 23.  $^{13}\text{C}$  NMR (75 MHz,  $\text{CDCl}_3$ ) of **4i**.

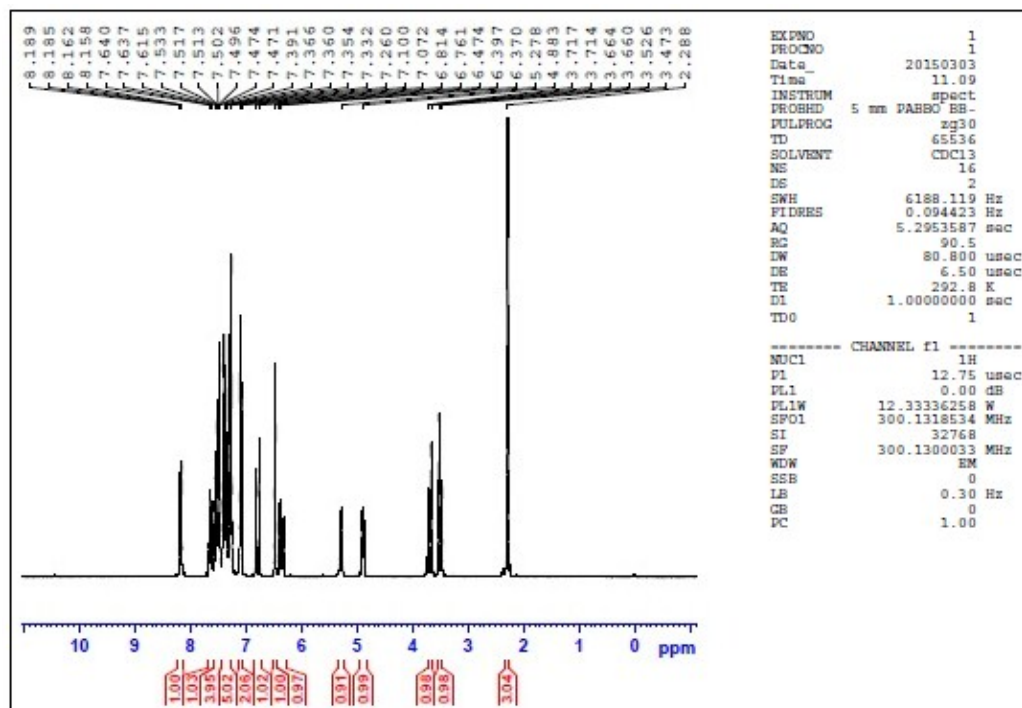

Figure S 24.  $^1\text{H}$  NMR (300 MHz,  $\text{CDCl}_3$ ) of **6a**.



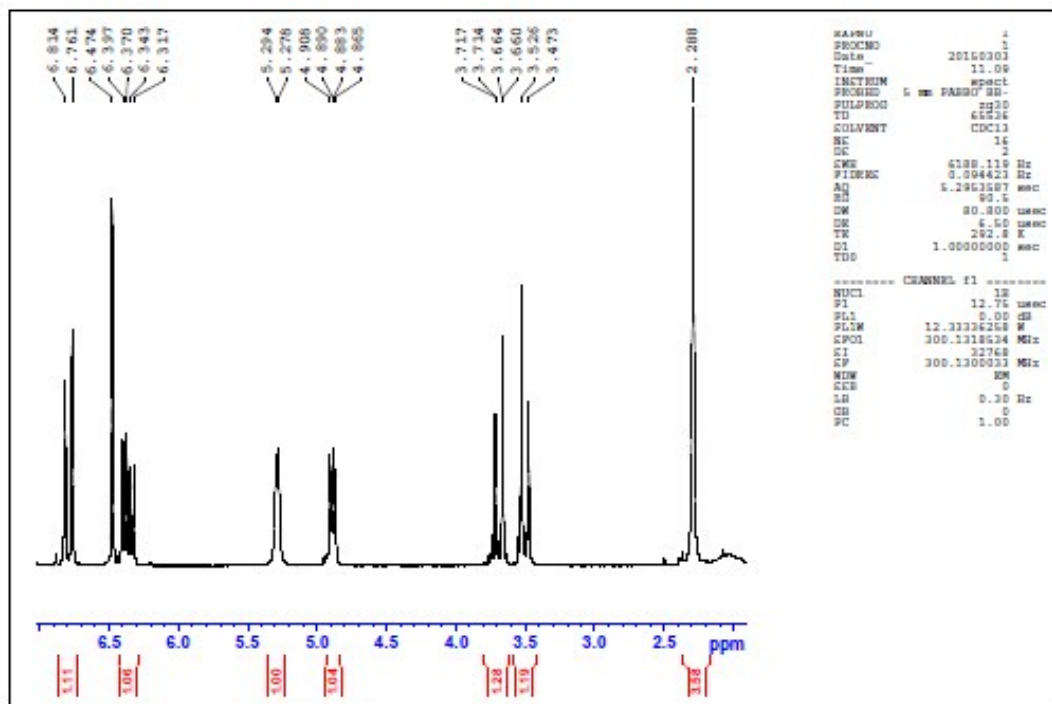

Figure S 25. <sup>1</sup>H NMR (300 MHz, CDCl<sub>3</sub>) of **6a** expansion.

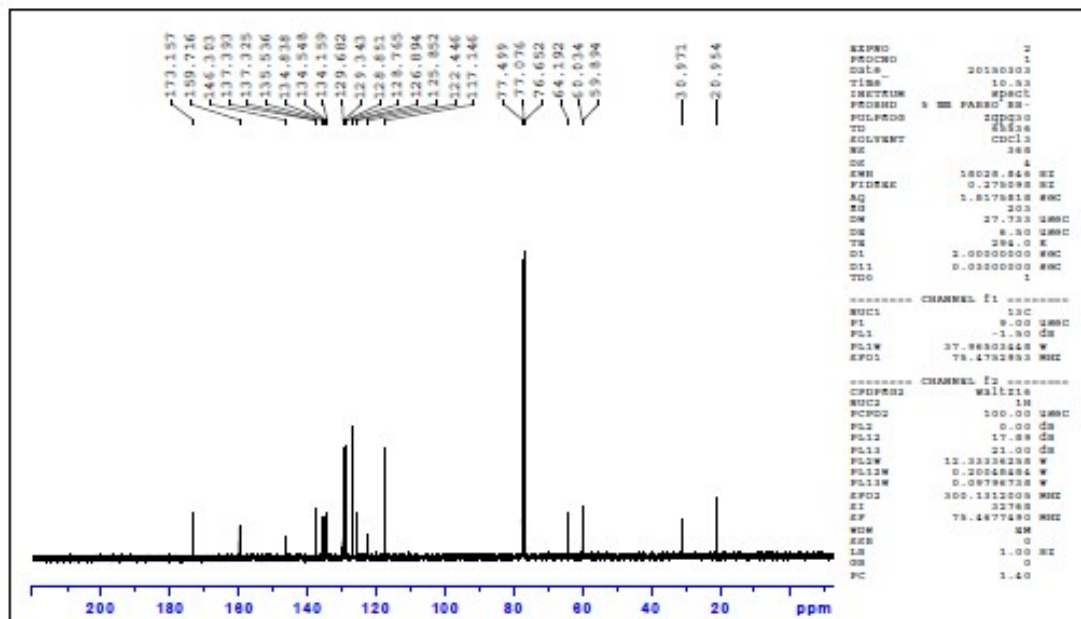

Figure S 26. <sup>13</sup>C NMR (75 MHz, CDCl<sub>3</sub>) of **6a**.



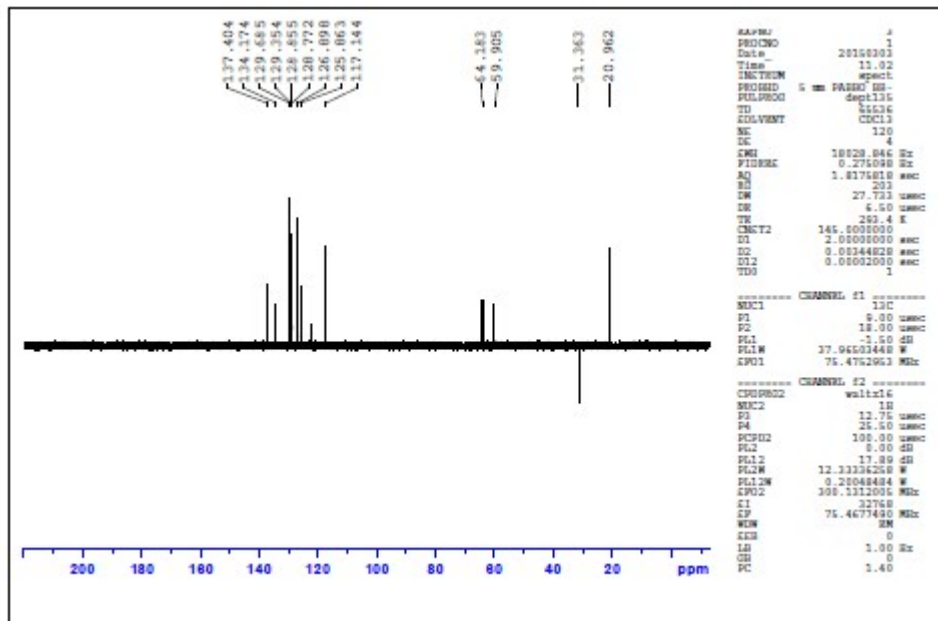

Figure S 27. DEPT NMR (75 MHz, CDCl<sub>3</sub>) of 6a.

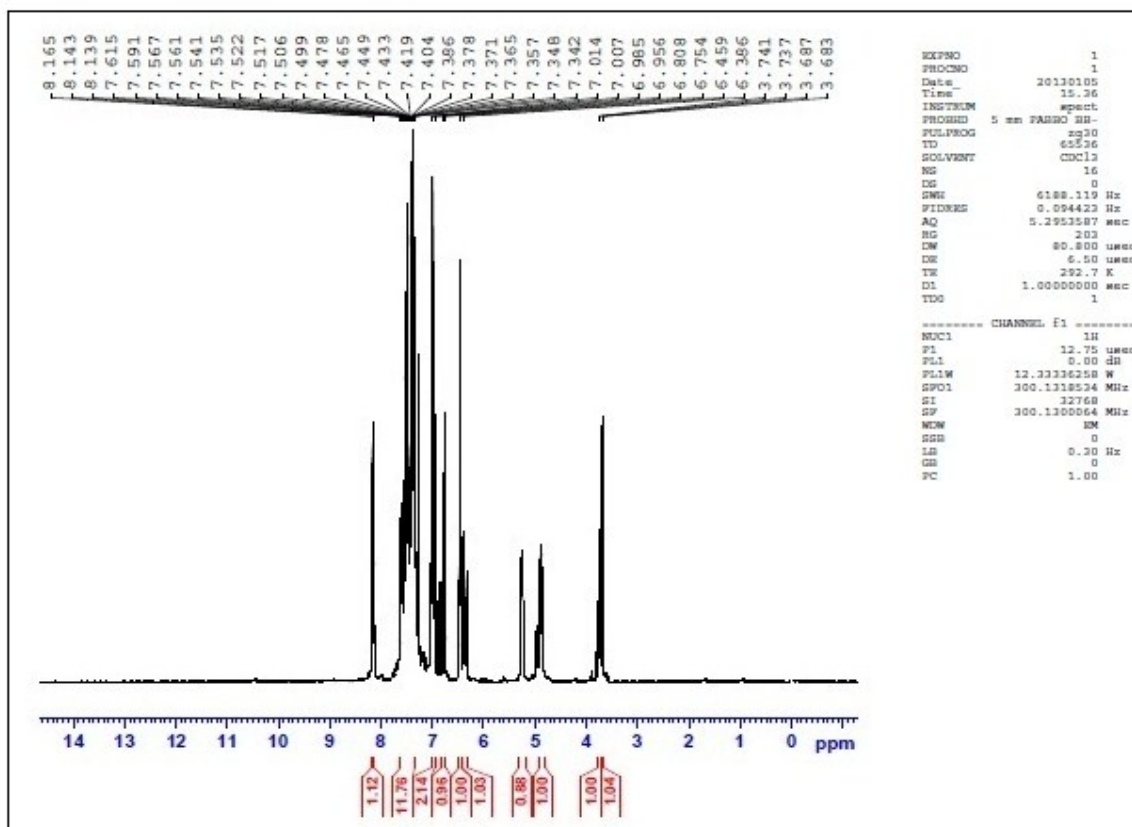

Figure S 28. <sup>1</sup>H NMR (300 MHz, CDCl<sub>3</sub>) of 6b.

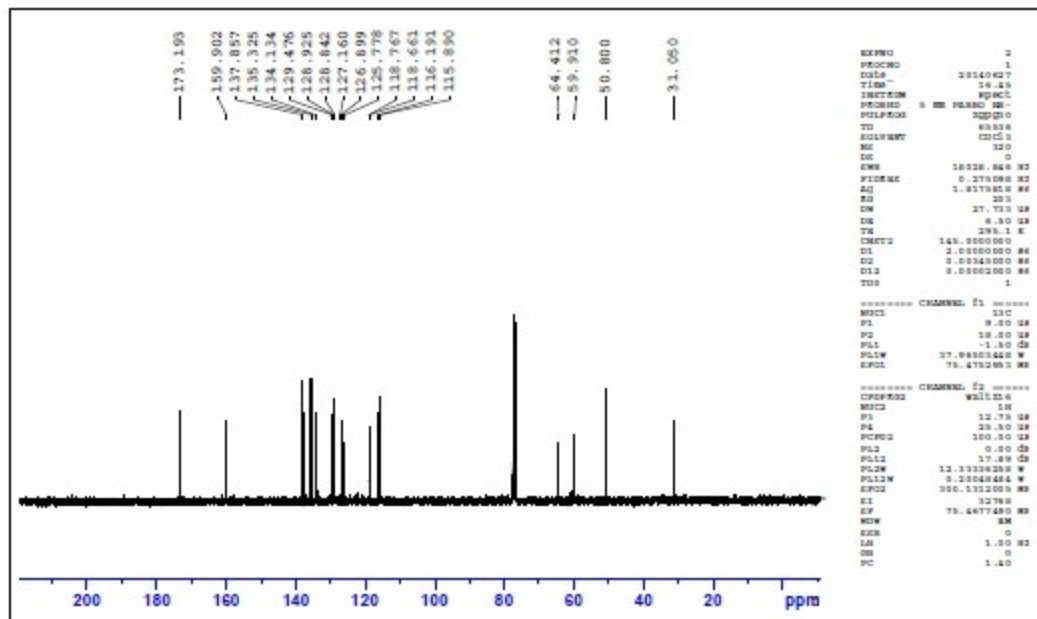

Figure S 29.  $^{13}\text{C}$  NMR (75 MHz,  $\text{CDCl}_3$ ) of **6b**.

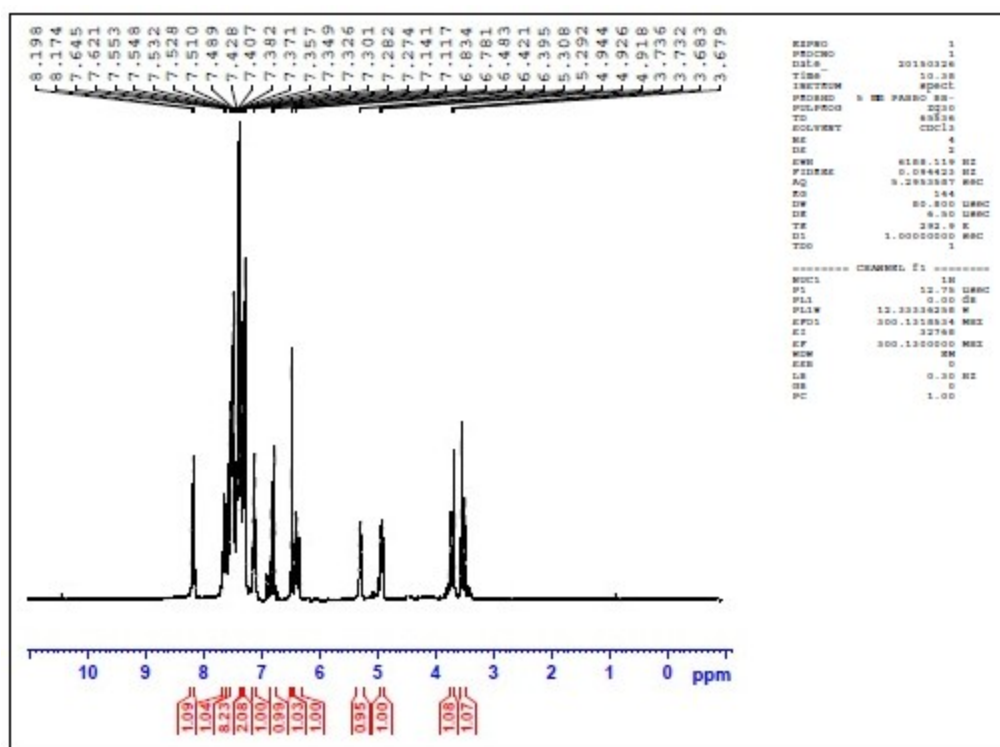

Figure S 30.  $^1\text{H}$  NMR (300 MHz,  $\text{CDCl}_3$ ) of **6c**.

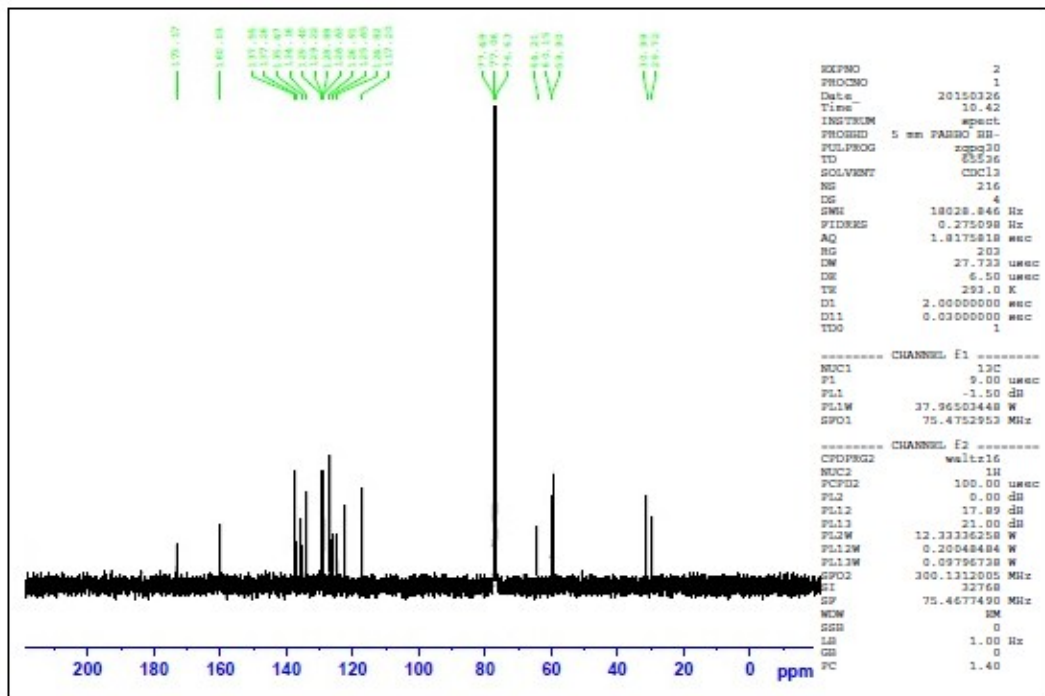

Figure S 31.  $^{13}\text{C}$  NMR (75 MHz,  $\text{CDCl}_3$ ) of **6c**.

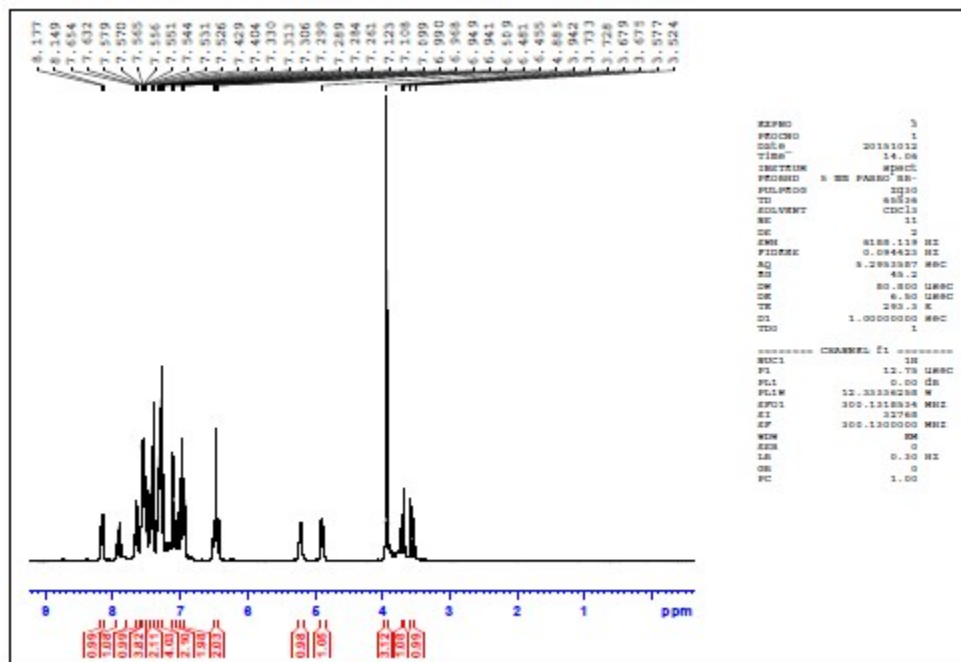

Figure S 32.  $^1\text{H}$  NMR (300 MHz,  $\text{CDCl}_3$ ) of **6d**.



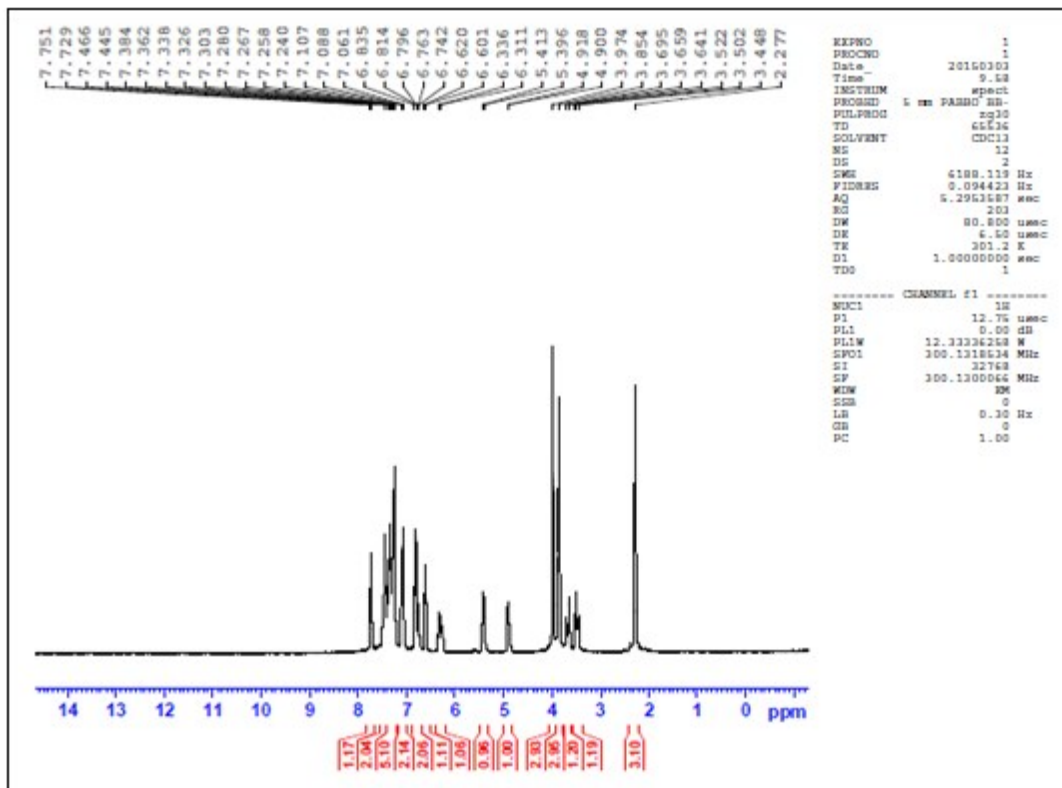

Figure S 35. <sup>1</sup>H NMR (300 MHz, CDCl<sub>3</sub>) of 6e.

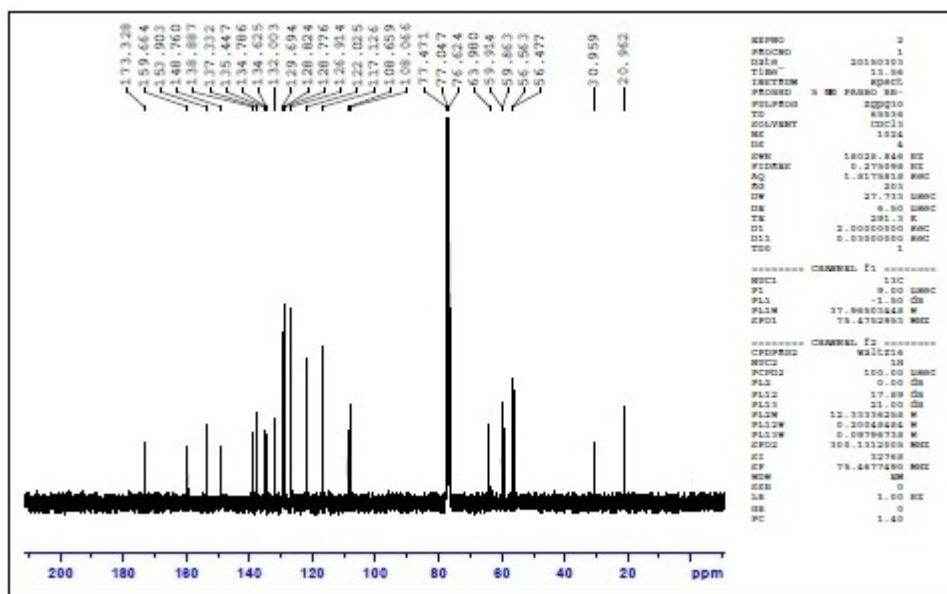

Figure S 36. <sup>13</sup>C NMR (75 MHz, CDCl<sub>3</sub>) of 6e.

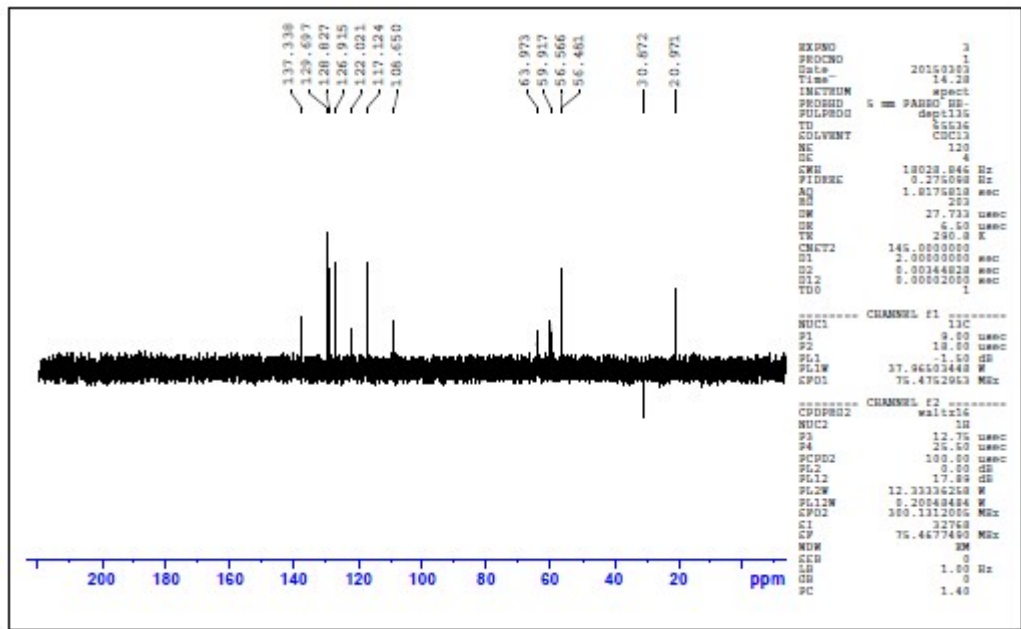

Figure S 37. DEPT NMR (75 MHz,  $\text{CDCl}_3$ ) of **6e**.

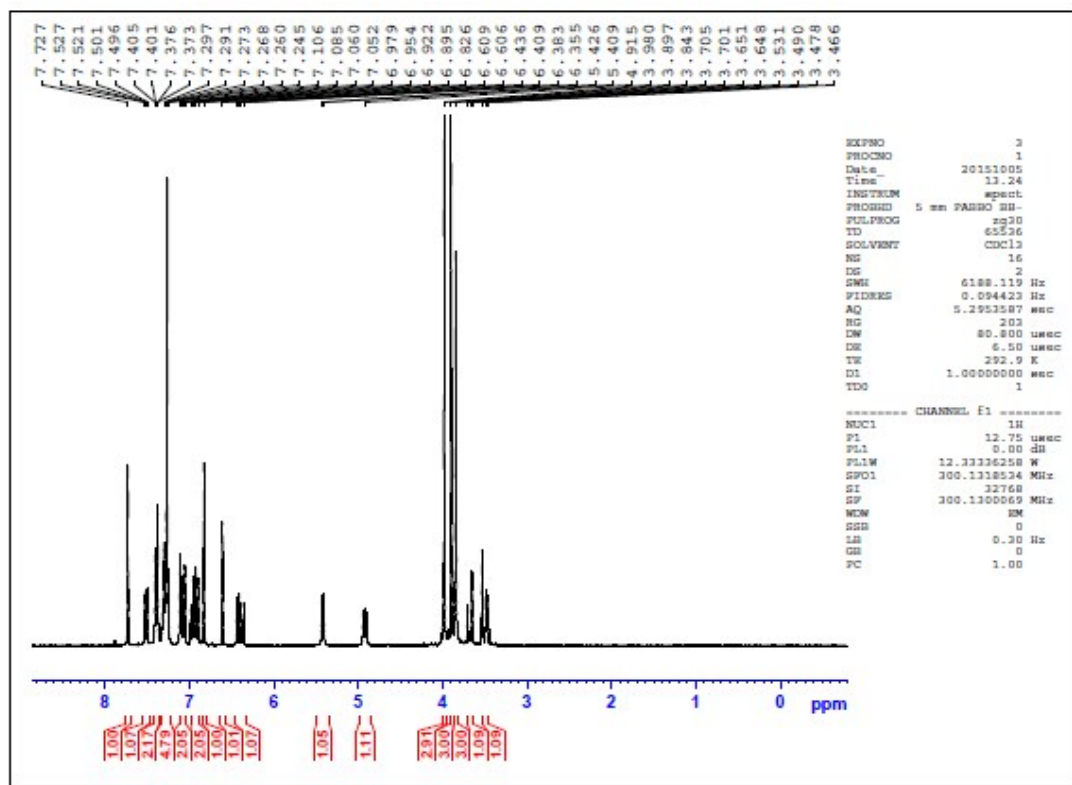

Figure S 38.  $^1\text{H}$  NMR (300 MHz,  $\text{CDCl}_3$ ) of **6f**.



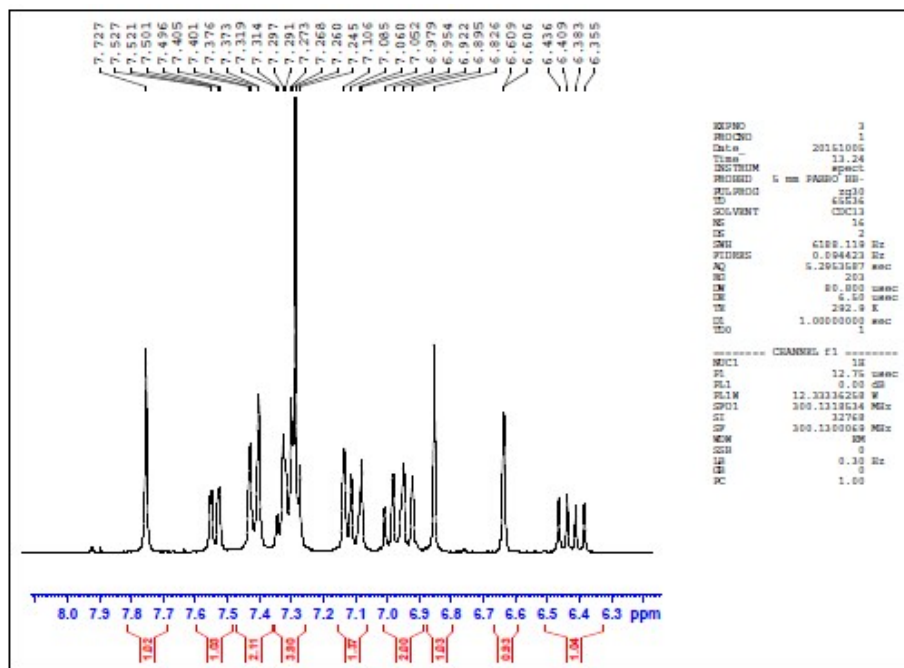

Figure S 39. <sup>1</sup>H NMR (300 MHz, CDCl<sub>3</sub>) of 6f expansion.

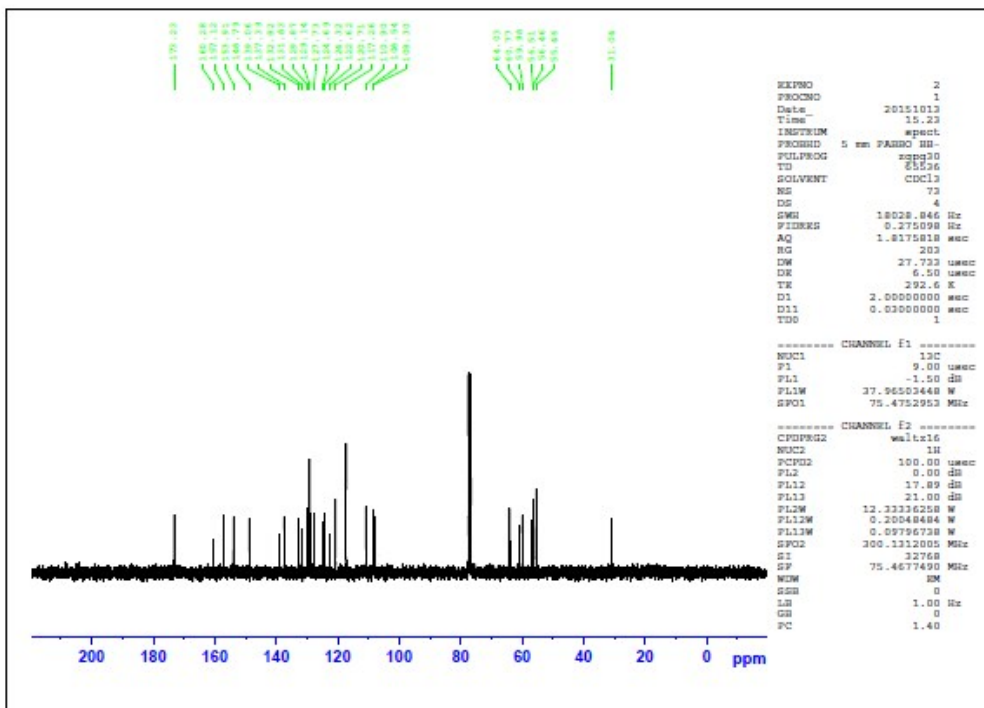

Figure S40. <sup>13</sup>C NMR (75 MHz, CDCl<sub>3</sub>) of 6f.







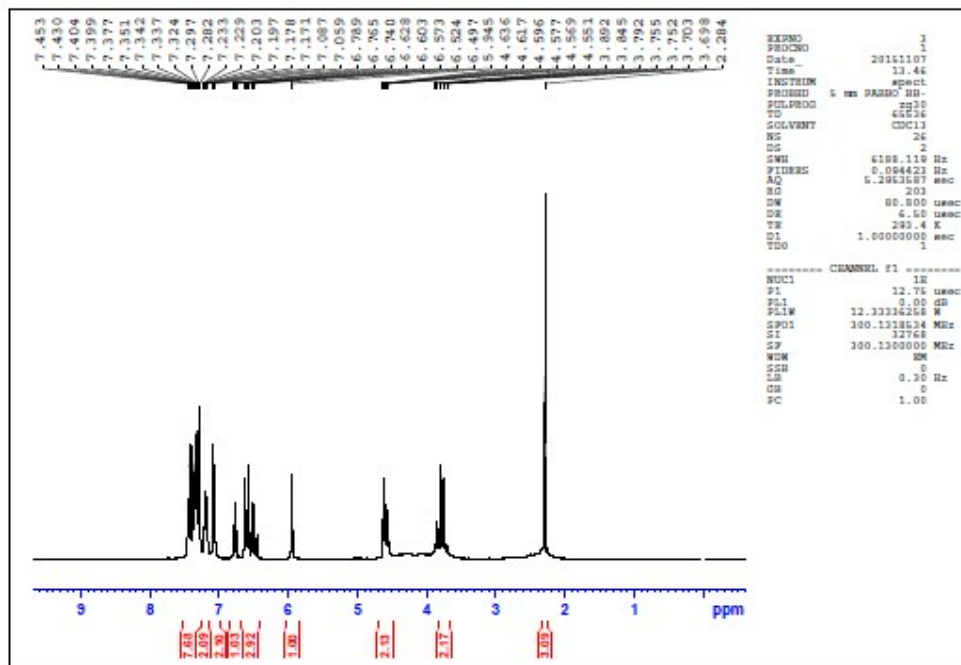

Figure S 45. <sup>1</sup>H NMR (300 MHz, CDCl<sub>3</sub>) of 7a.

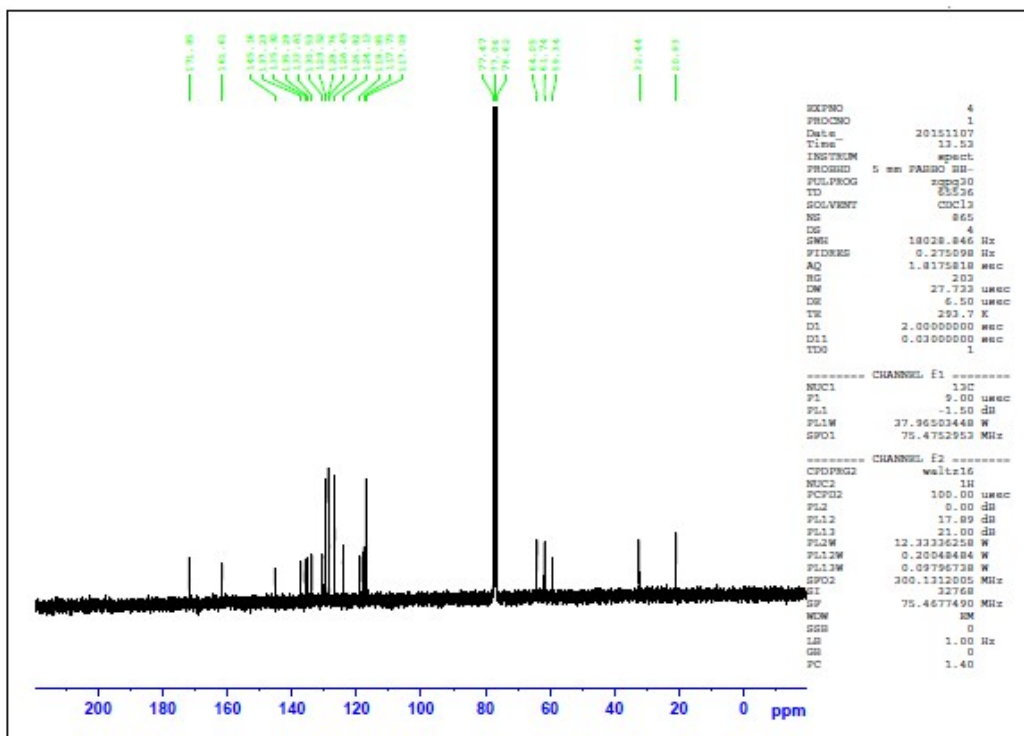

Figure S 46. <sup>13</sup>C NMR (75 MHz, CDCl<sub>3</sub>) of 7a.

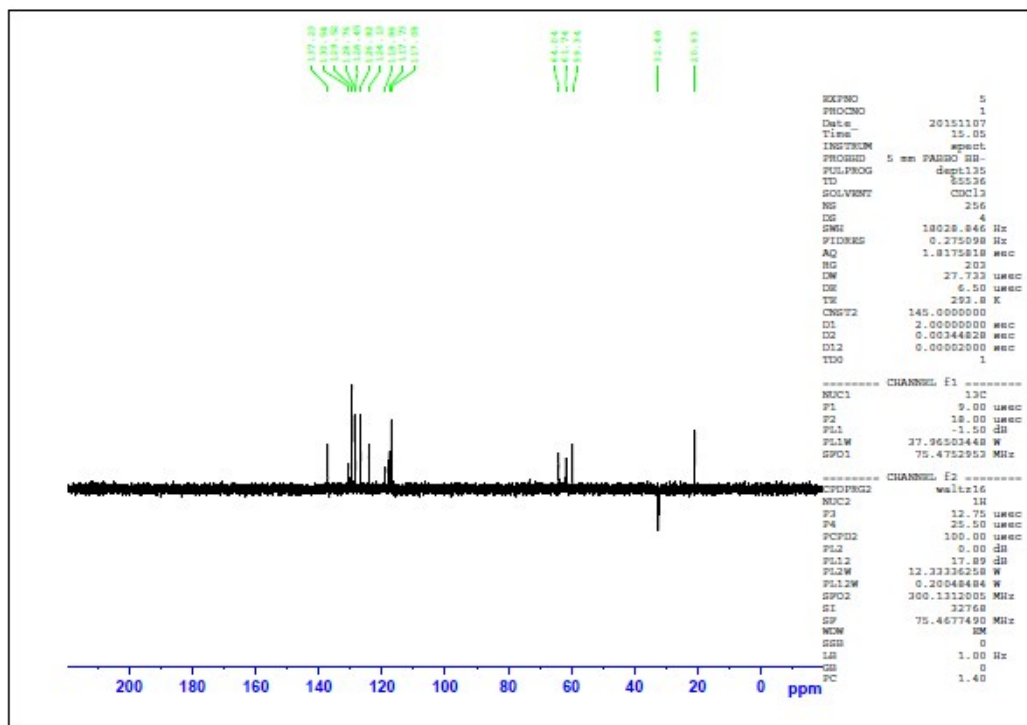

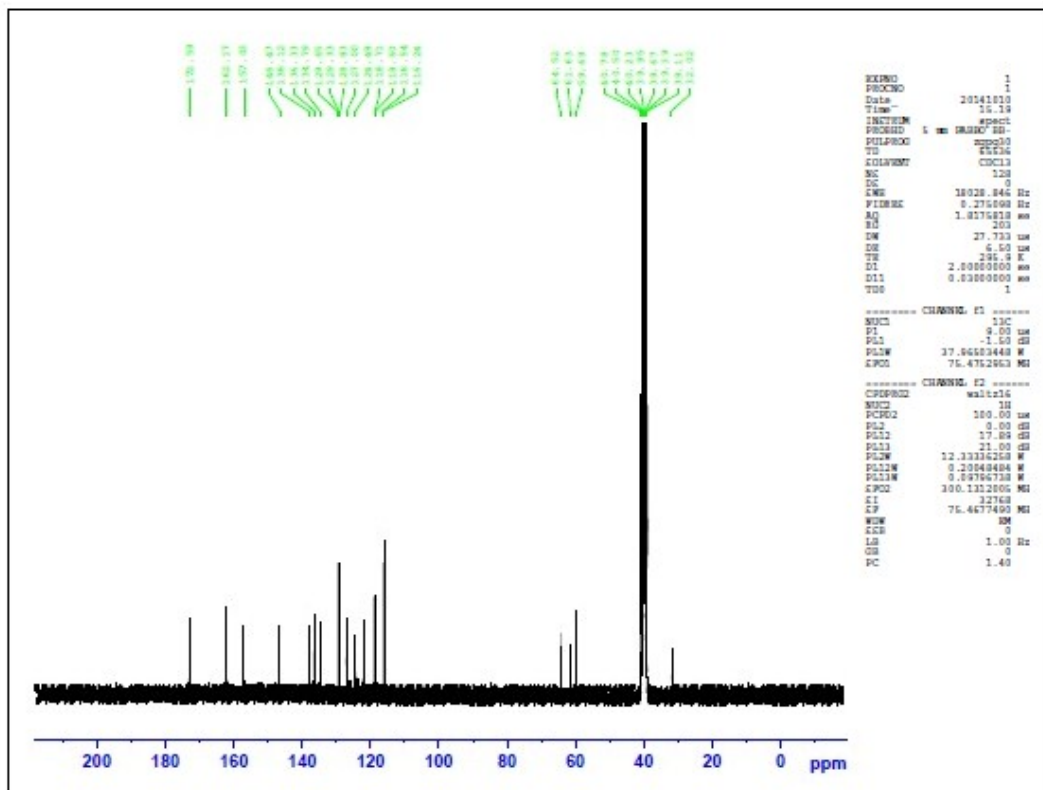





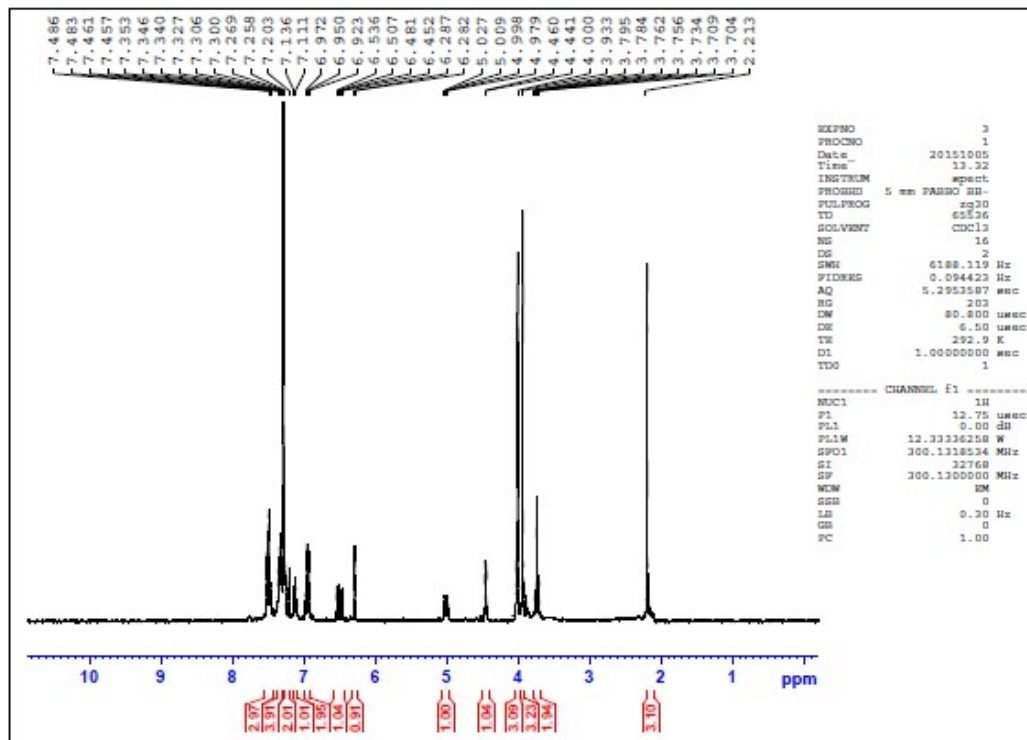

Figure S 55.  $^1\text{H}$  NMR (300 MHz,  $\text{CDCl}_3$ ) of **7e**.

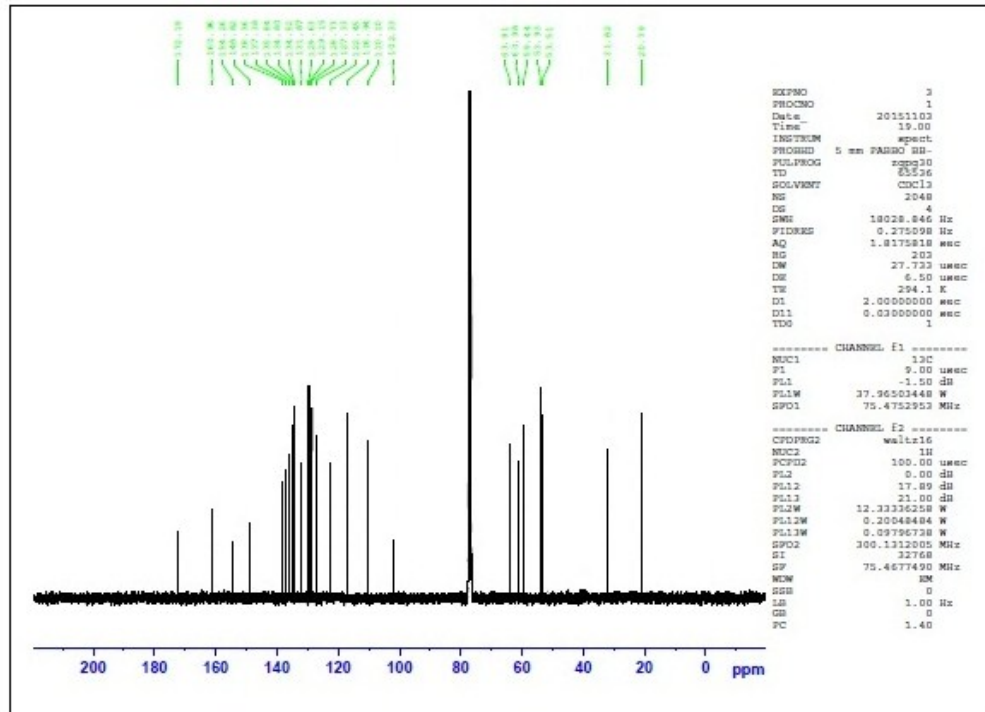

Figure S 56.  $^{13}\text{C}$  NMR (75 MHz,  $\text{CDCl}_3$ ) of **7e**.















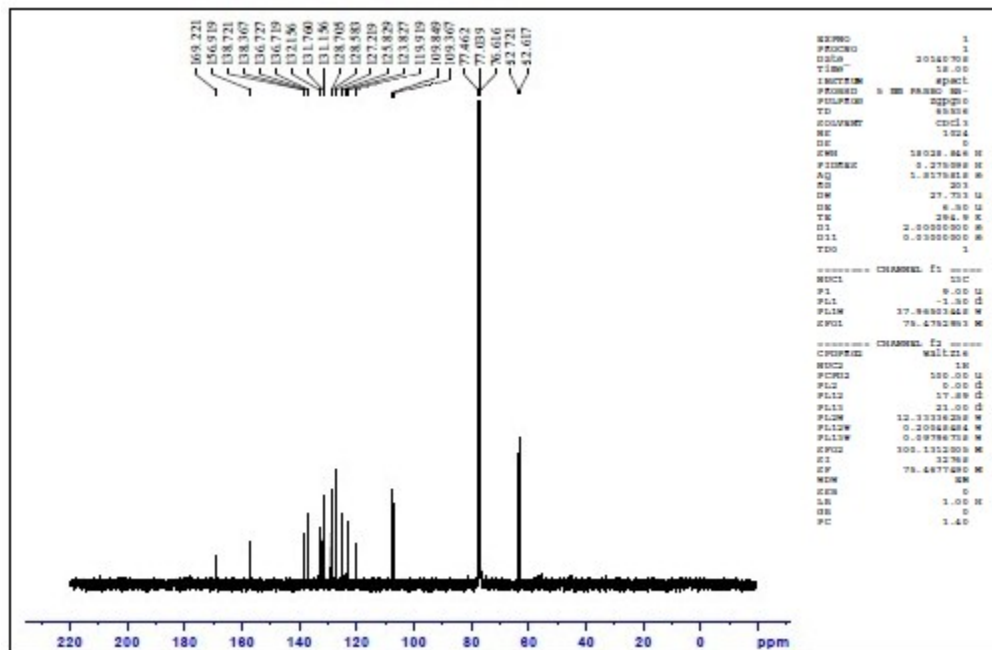

Figure S 67.  $^{13}\text{C}$  NMR (75 MHz,  $\text{CDCl}_3$ ) of **8b**.

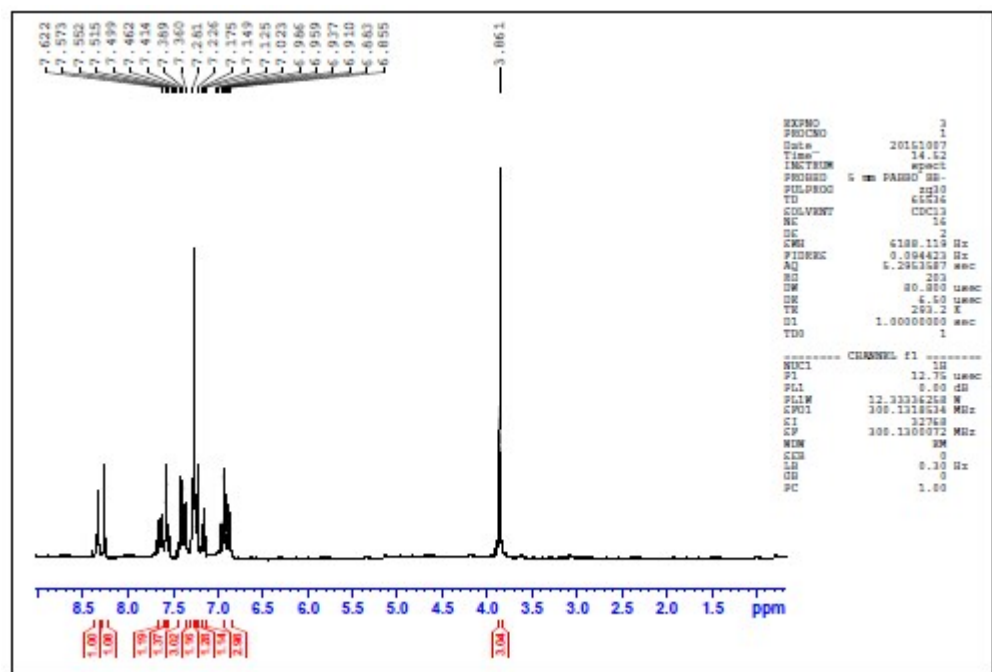

Figure S 68.  $^1\text{H}$  NMR (300 MHz,  $\text{CDCl}_3$ ) of **8c**.

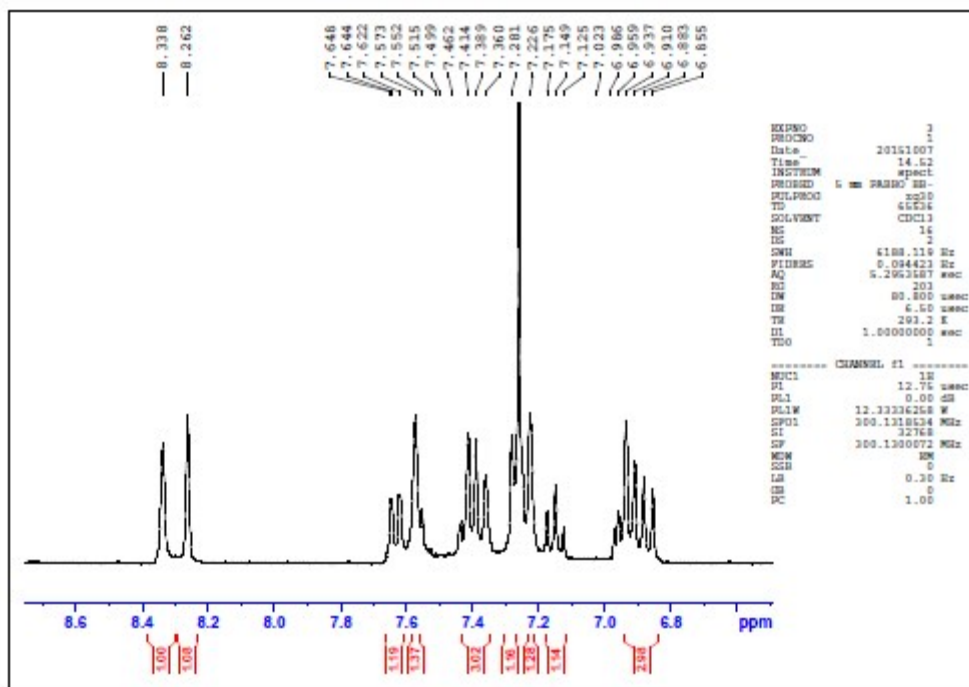

Figure S 69.  $^1\text{H}$  NMR (300 MHz,  $\text{CDCl}_3$ ) of **8c** expansion.

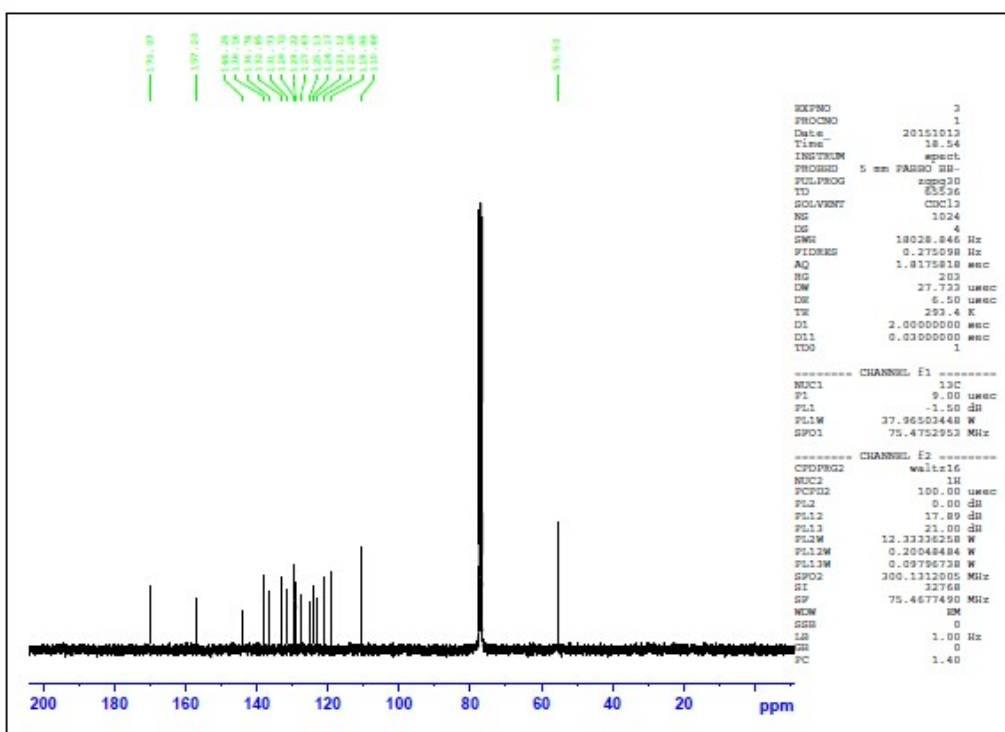

Figure S 70.  $^{13}\text{C}$  NMR (75 MHz,  $\text{CDCl}_3$ ) of **8c**.

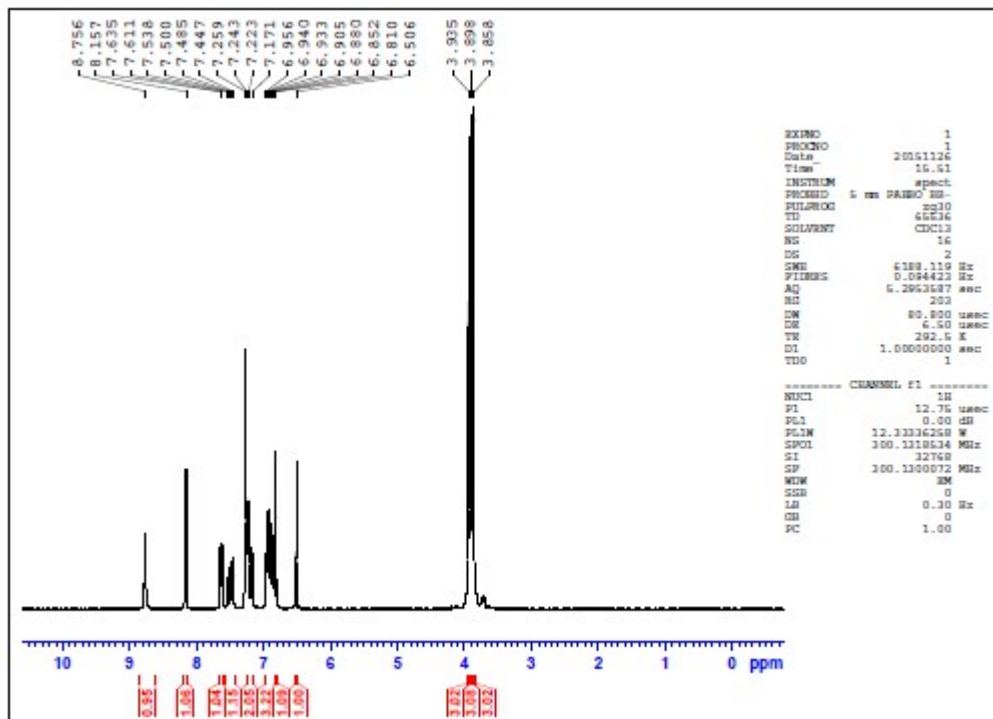

Figure S 71.  $^1\text{H}$  NMR (300 MHz,  $\text{CDCl}_3$ ) of **8d**.

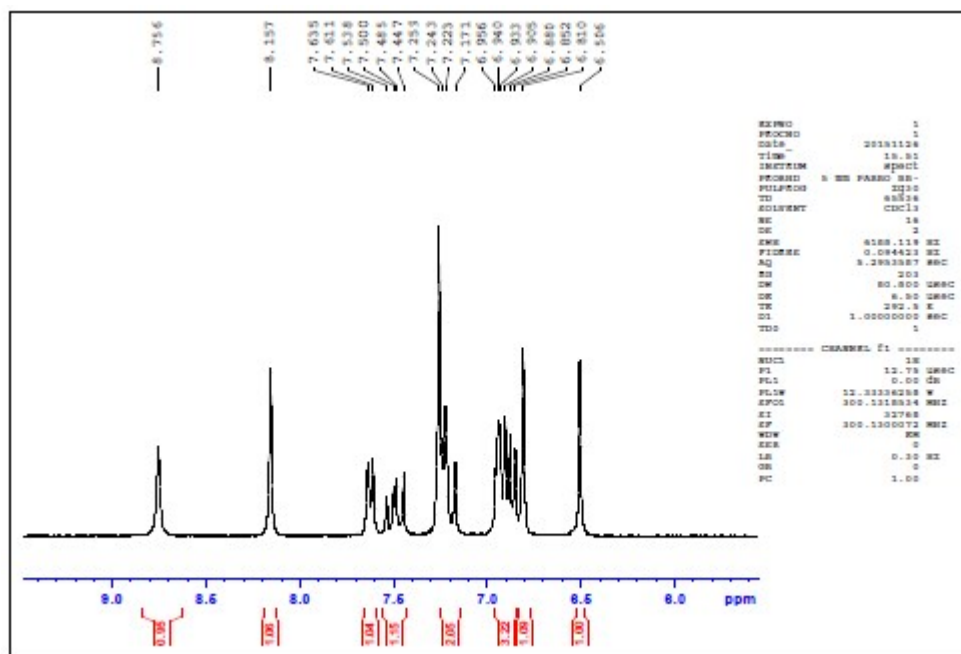

Figure S 72.  $^1\text{H}$  NMR (300 MHz,  $\text{CDCl}_3$ ) of **8d** expansion.







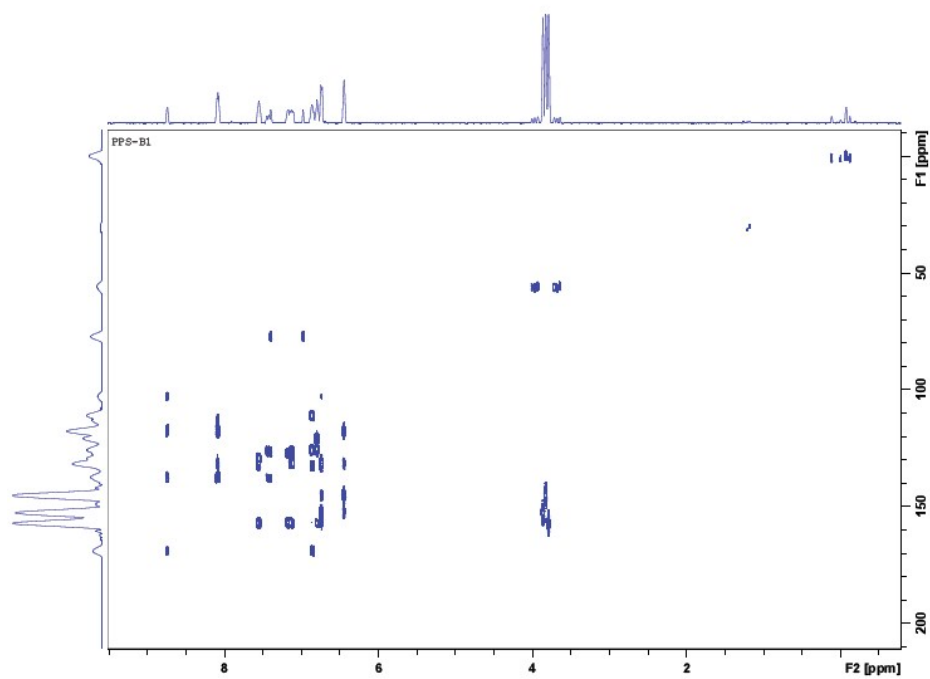

**Figure S 75.** HMBC NMR (75 MHz,  $\text{CDCl}_3$ ) of **8d**.

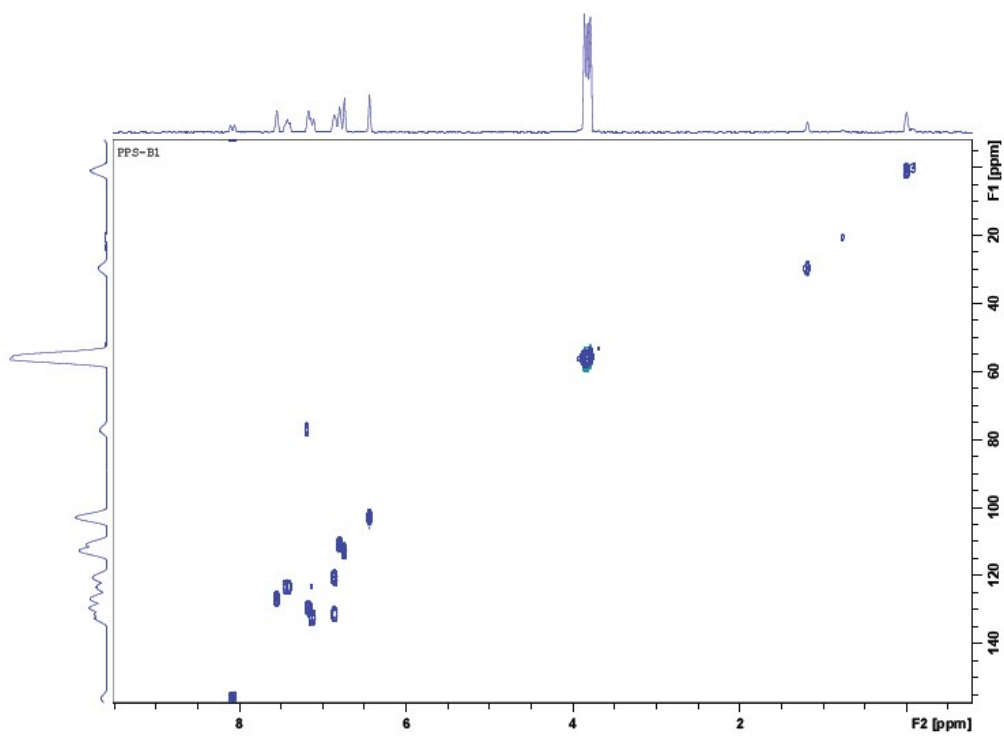

**Figure S 76.** HSQC NMR (75 MHz,  $\text{CDCl}_3$ ) of **8d**.

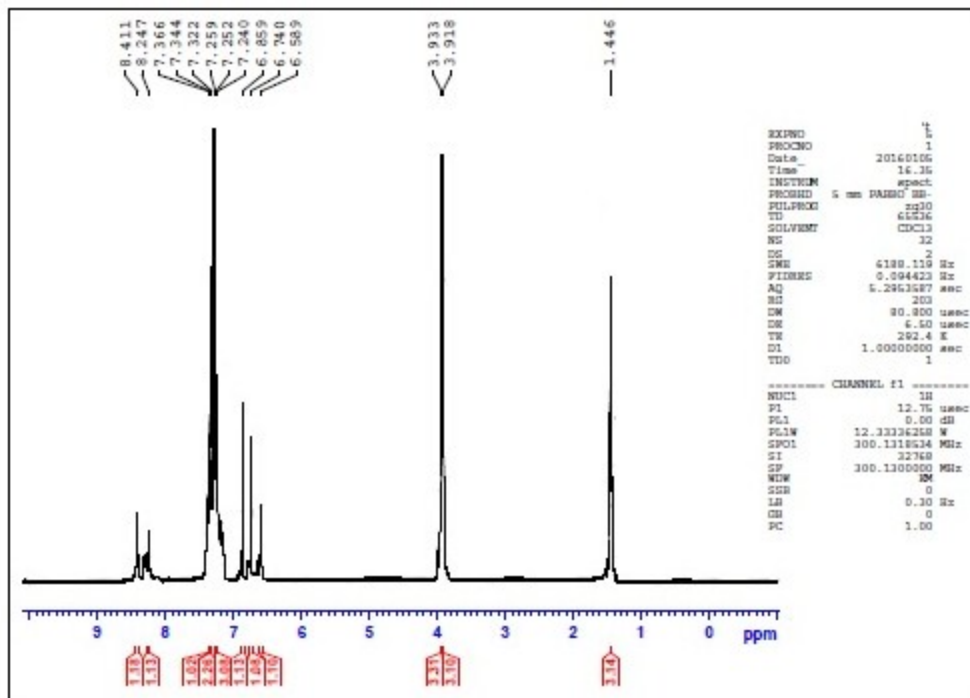

Figure S 77.  $^1\text{H}$  NMR (300 MHz,  $\text{CDCl}_3$ ) of **8e**.

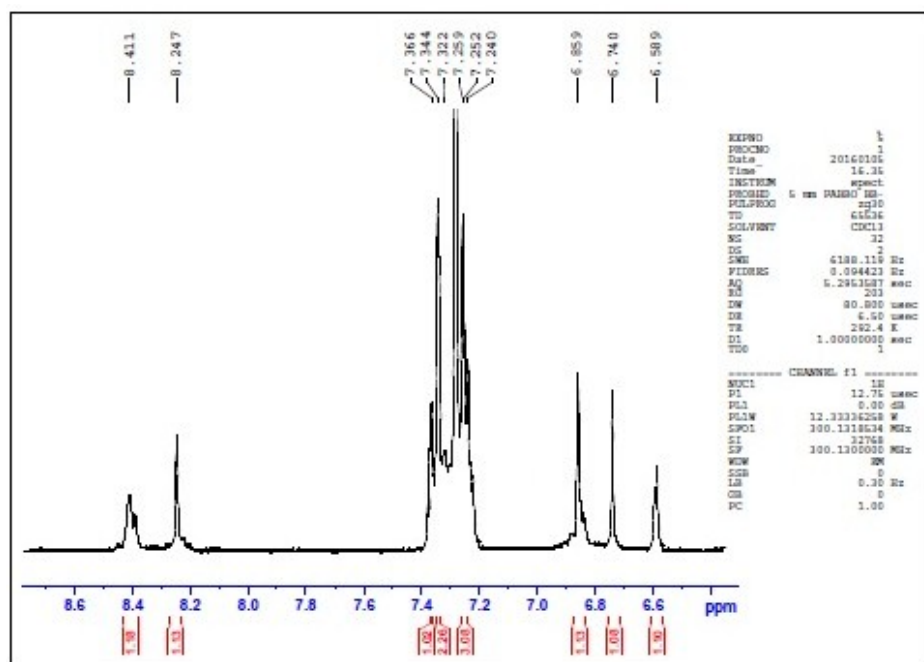

Figure S 78.  $^1\text{H}$  NMR (300 MHz,  $\text{CDCl}_3$ ) of **8e** expansion.

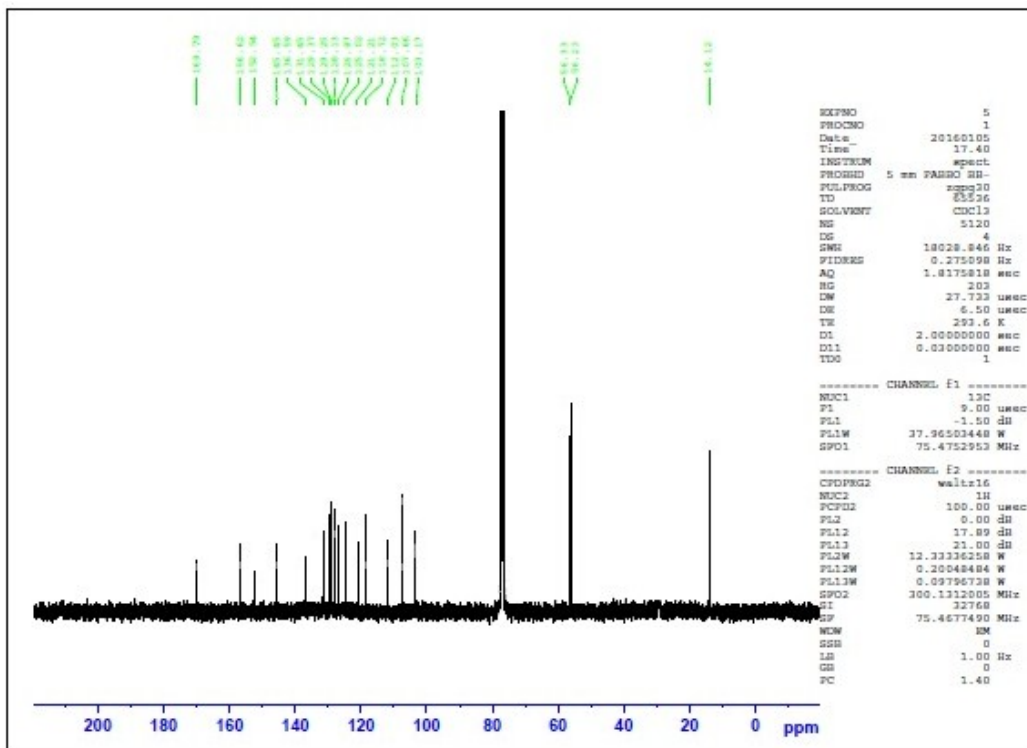

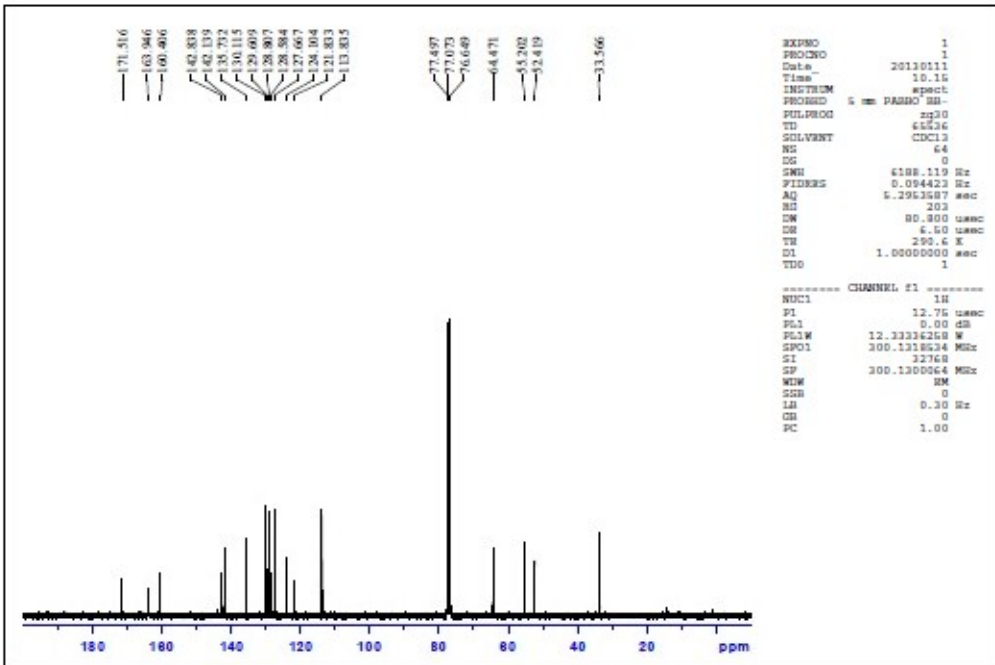

Figure S 81. <sup>13</sup>C NMR (75 MHz, CDCl<sub>3</sub>) of 9a.

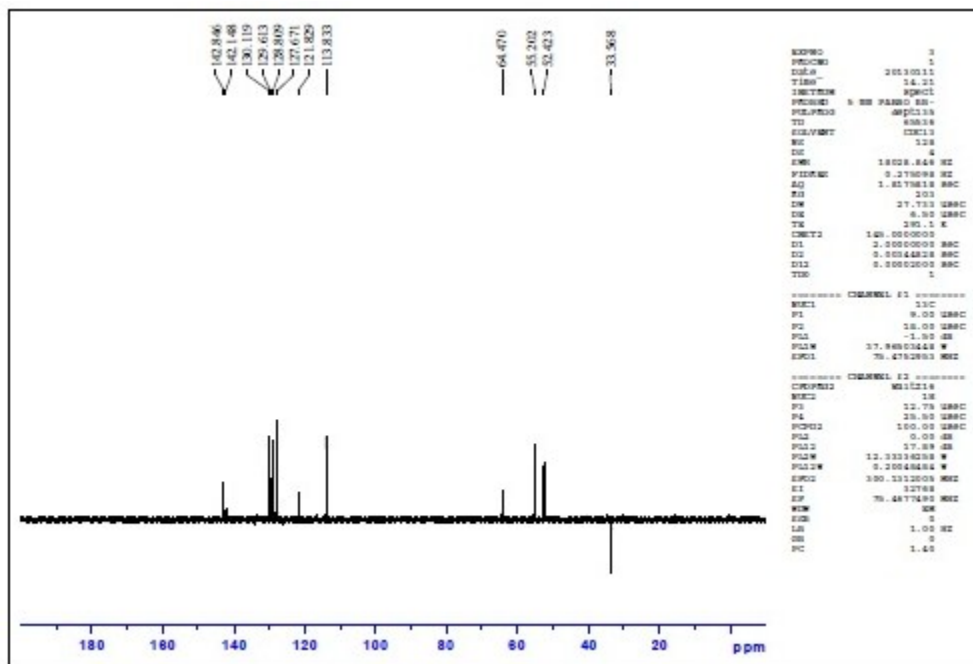

Figure S 82. DEPT NMR (75 MHz, CDCl<sub>3</sub>) of 9a.

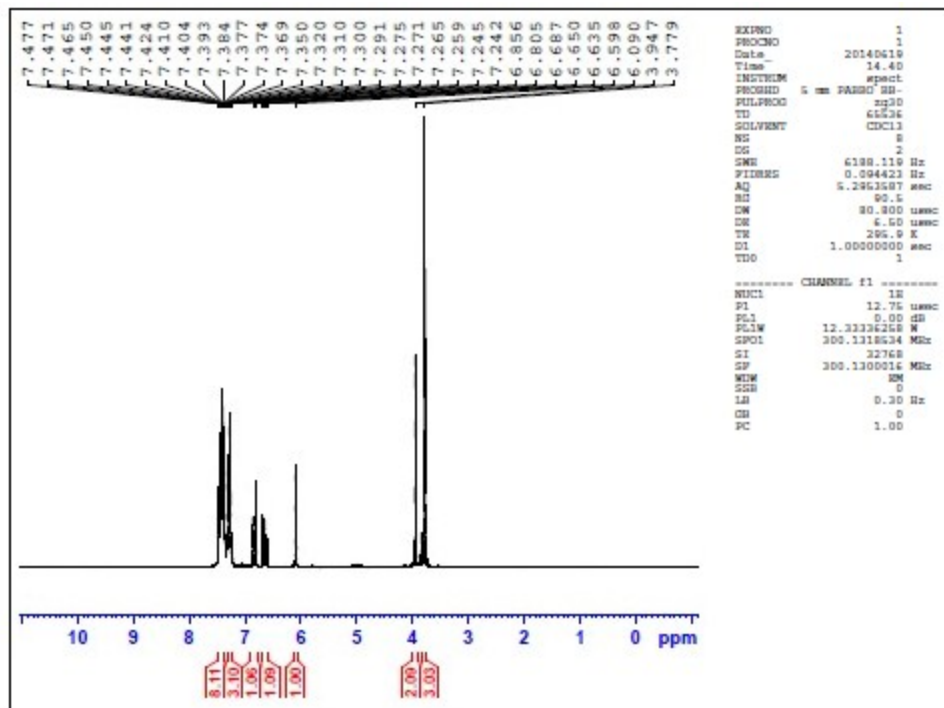

Figure S 83.  $^1\text{H}$  NMR (300 MHz,  $\text{CDCl}_3$ ) of **9b**.

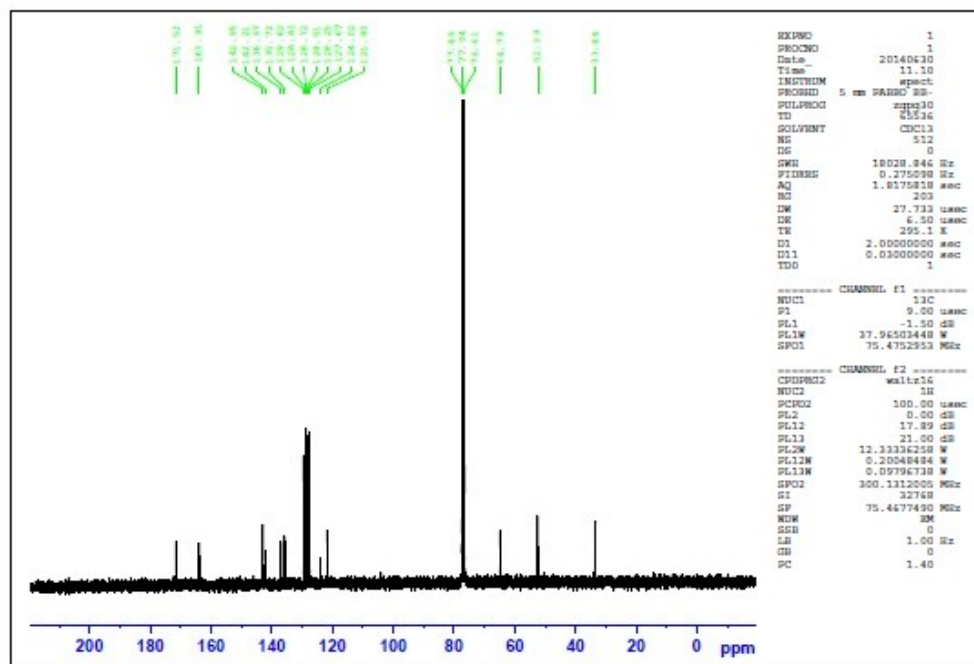

Figure S 84.  $^{13}\text{C}$  NMR (75 MHz,  $\text{CDCl}_3$ ) of **9b**.



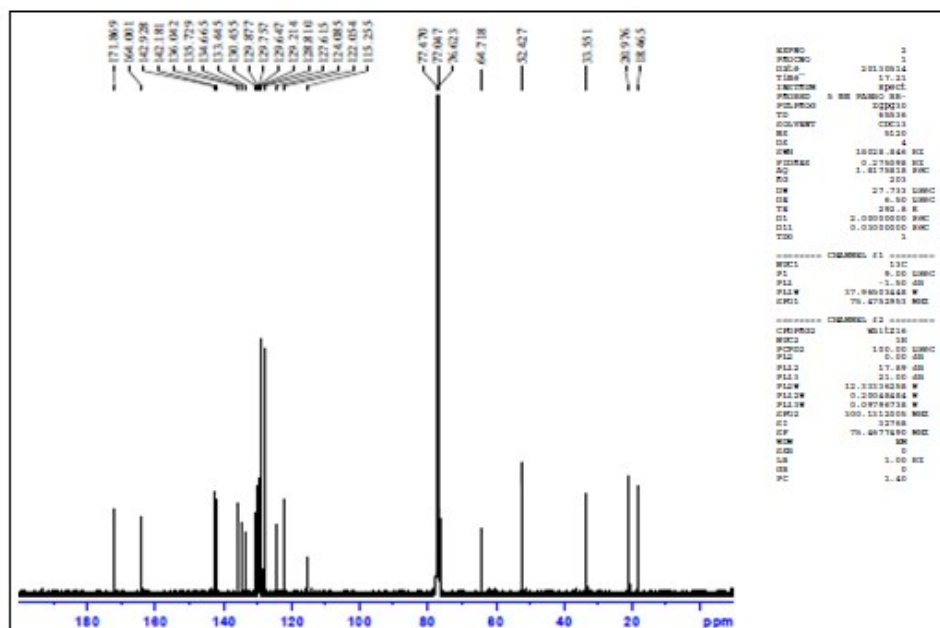

Figure S 87.  $^{13}\text{C}$  NMR (75 MHz,  $\text{CDCl}_3$ ) of **9c**.

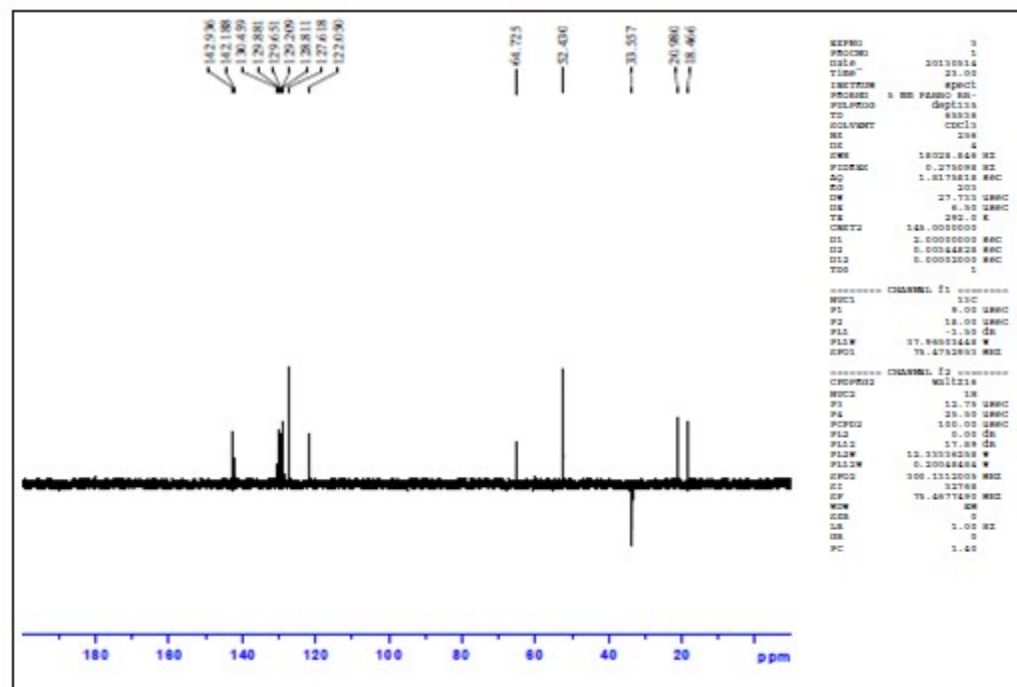

Figure S 88. DEPT NMR (75 MHz,  $\text{CDCl}_3$ ) of **9c**.

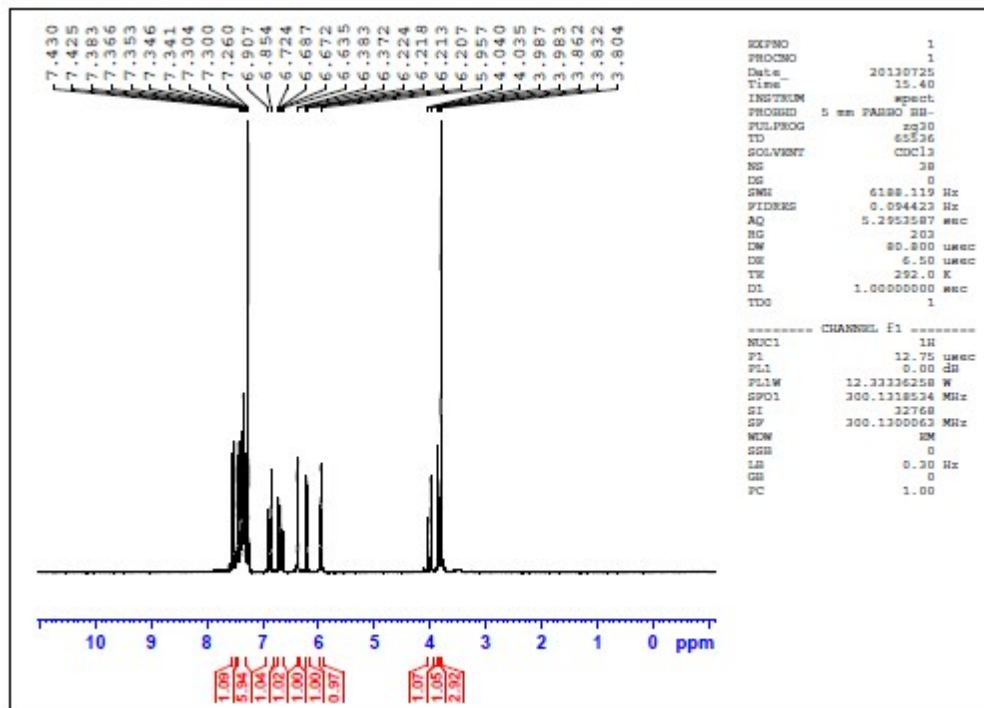

Figure S 89.  $^1\text{H}$  NMR (300 MHz,  $\text{CDCl}_3$ ) of 9d.

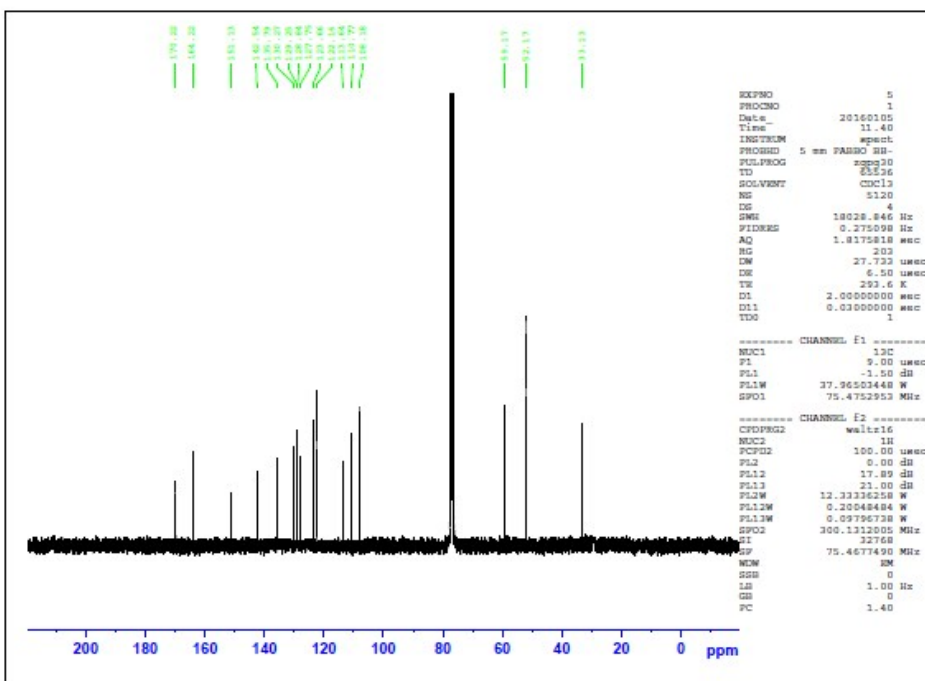

Figure S 90.  $^{13}\text{C}$  NMR (75 MHz,  $\text{CDCl}_3$ ) of 9d.



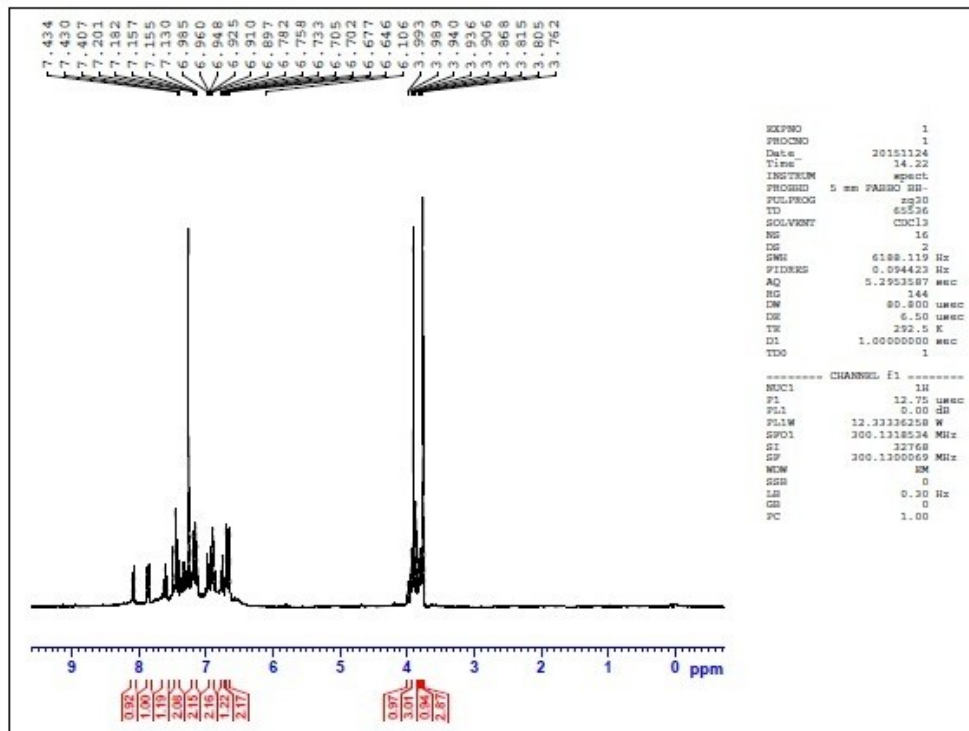

Figure S 91.  $^1\text{H}$  NMR (300 MHz,  $\text{CDCl}_3$ ) of **9e**.

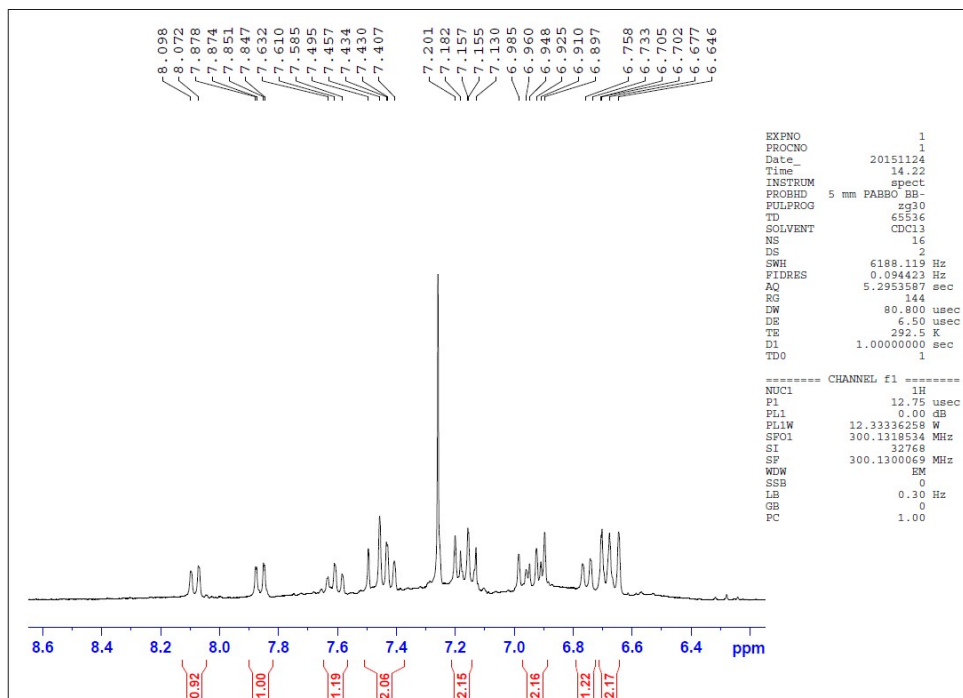

Figure S 91A.  $^1\text{H}$  NMR (300 MHz,  $\text{CDCl}_3$ ) of **9e** expansion.

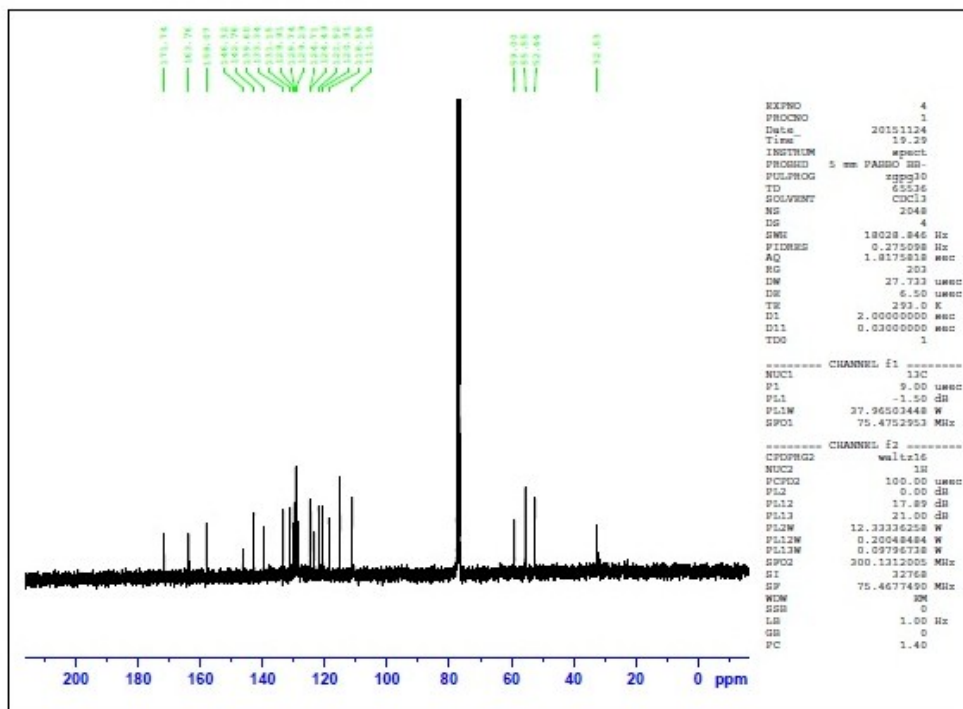

Figure S 92. <sup>13</sup>C NMR (75 MHz, CDCl<sub>3</sub>) of **9e**.

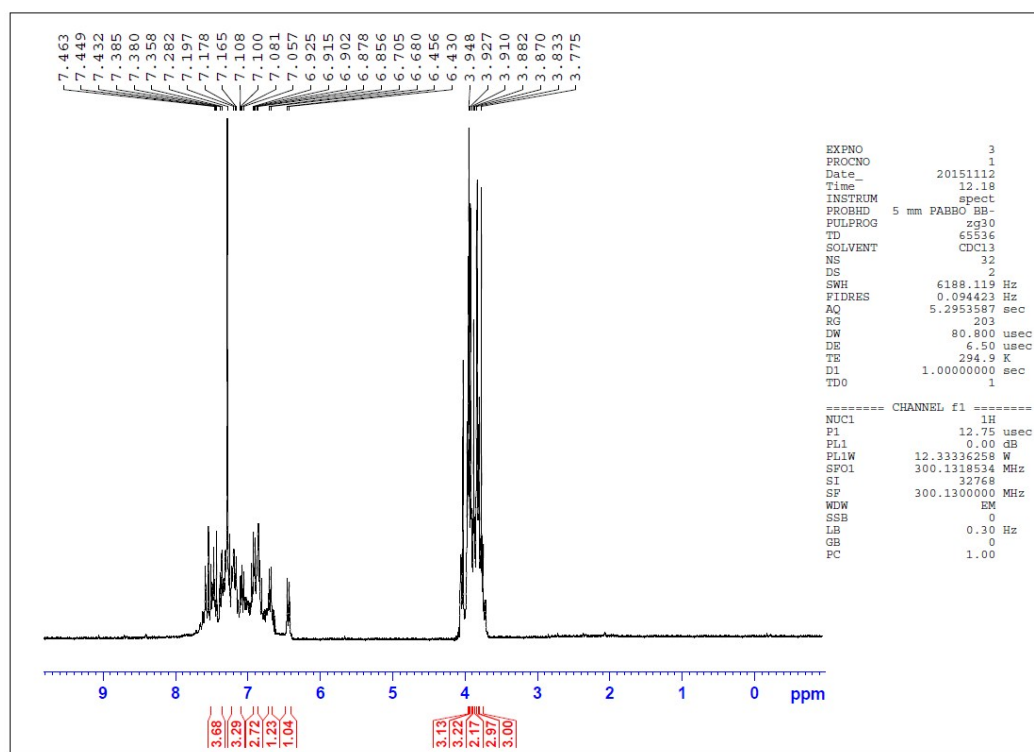

Figure S 93. <sup>1</sup>H NMR (300 MHz, CDCl<sub>3</sub>) of **9f**.

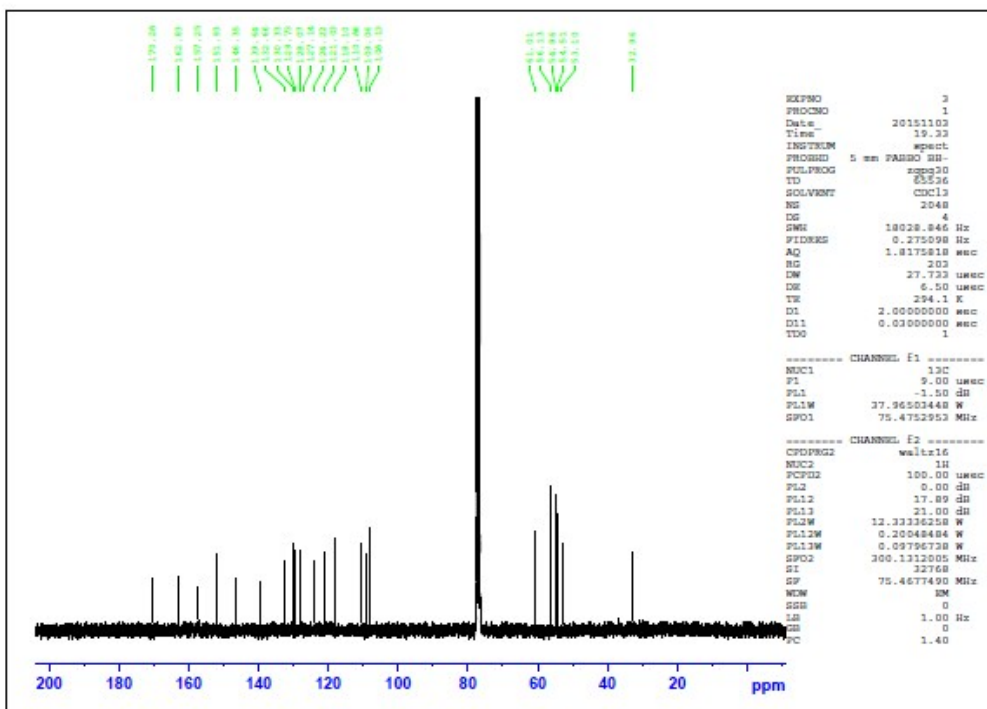

Figure S 94.  $^{13}\text{C}$  NMR (75 MHz,  $\text{CDCl}_3$ ) of **9f**.

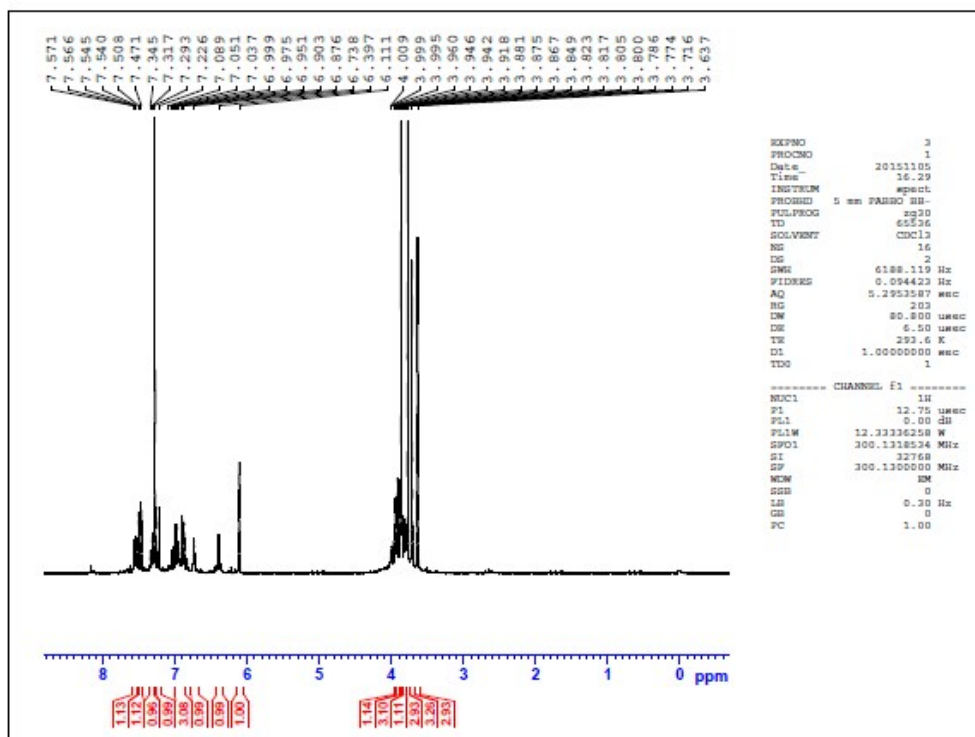

Figure S 95.  $^1\text{H}$  NMR (300 MHz,  $\text{CDCl}_3$ ) of **9g**.

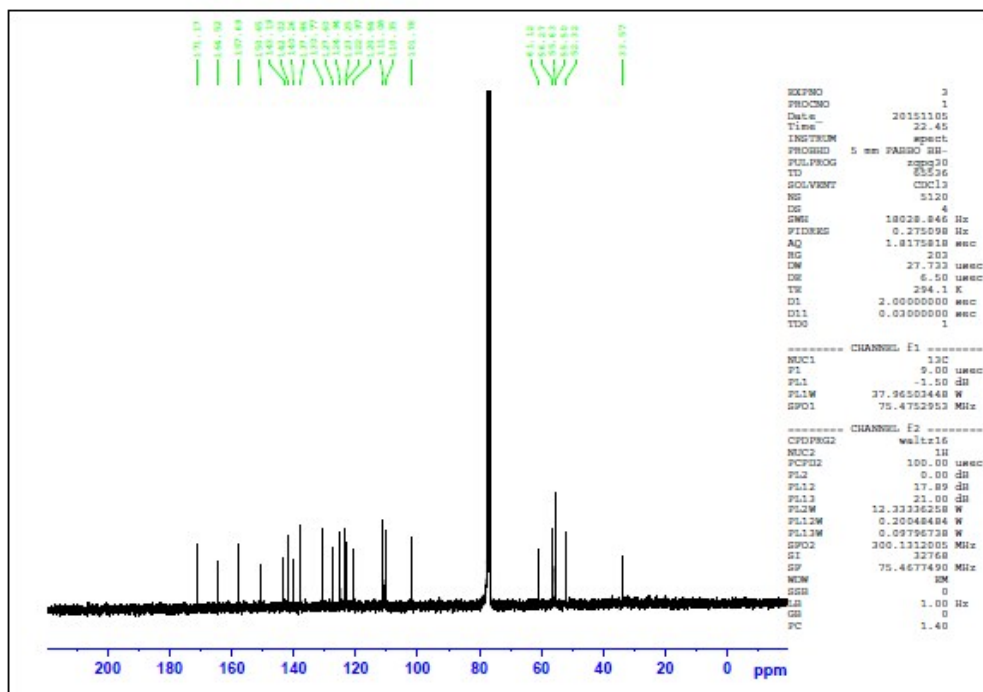

Figure S 96.  $^{13}\text{C}$  NMR (75 MHz,  $\text{CDCl}_3$ ) of **9g**.

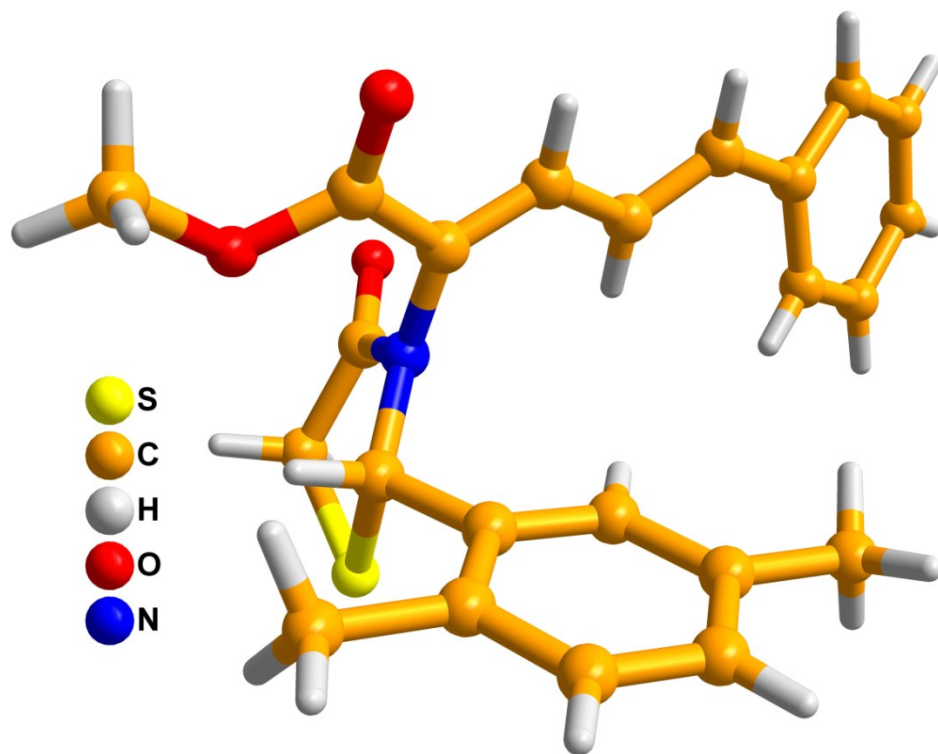

Figure S 97. Crystal structure of **9c**.

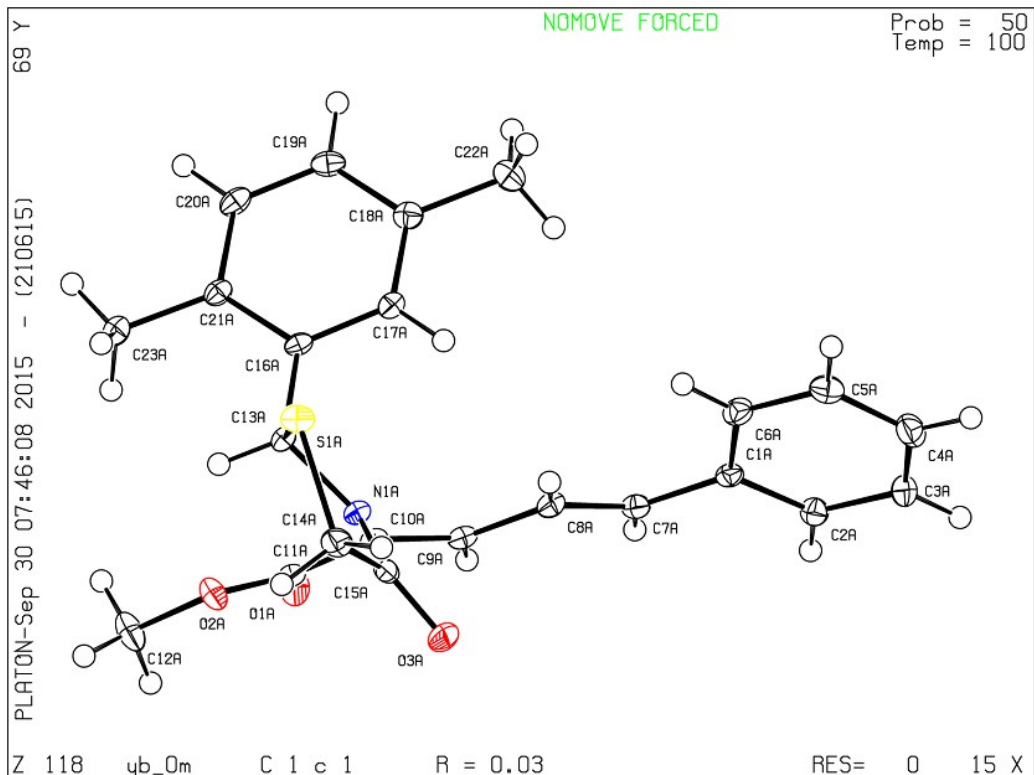

**Figure S 98.** X-ray crystal structure of **9c** with atom numbers (Ellipsoid plot).

**Table S1.** Crystal data and structure refinement for **9c**.

|                       |                                                                                                          |
|-----------------------|----------------------------------------------------------------------------------------------------------|
| Identification code   | yb_0m                                                                                                    |
| Empirical formula     | C <sub>23</sub> H <sub>23</sub> NO <sub>3</sub> S                                                        |
| Mr                    | 393.48                                                                                                   |
| Temperature           | 100 K                                                                                                    |
| Wavelength            | 0.71073 Å                                                                                                |
| Space group           | C1(1)                                                                                                    |
| Unit cell dimensions  | a = 7.2967(5) Å    alpha= 90°<br>b = 18.0150(13) Å    beta= 97.477(°)<br>c = 15.0313(11) Å    gamma= 90° |
| Bond precision:       | C-C = 0.0021 Å                                                                                           |
| Volume                | 1959.1 (2) Å <sup>3</sup>                                                                                |
| Dx,g cm-3             | 1.334                                                                                                    |
| Z                     | 4                                                                                                        |
| Mu (mm-1)             | 0.189                                                                                                    |
| F000                  | 832.0                                                                                                    |
| h, k, l max           | 9, 24, 20                                                                                                |
| Nref                  | 3540                                                                                                     |
| Npar                  | 256                                                                                                      |
| Tmin, Tmax            | 0.959 and 0.963                                                                                          |
| Absorption correction | PSI-SCAN                                                                                                 |
| Data completeness     | 1.45/0.73                                                                                                |

---

|                  |               |
|------------------|---------------|
| Theta(max)       | 28.310        |
| R(reflections)   | 0.0277( 3403) |
| wR2(reflections) | 0.0704( 3540) |
| S                | 1.053         |

---
